# Supplementary material
Source: PubMed Central journal article supplement (PMC4776029)
Supplement: mmc3.pdf [file mmc3.pdf]

## Article

# Dynamics and Interactions of OmpF and LPS: Influence on Pore Accessibility and Ion Permeability

Dhilon S. Patel,<sup>1</sup> Suyong Re,<sup>2,3,4</sup> Emilia L. Wu,<sup>1</sup> Yifei Qi,<sup>1</sup> Phillip E. Klebba,<sup>5</sup> Göran Widmalm,<sup>6</sup> Min Sun Yeom,<sup>7</sup> Yuji Sugita,<sup>2,3,4</sup> and Wonpil Im<sup>1,\*</sup>

<sup>1</sup>Department of Molecular Biosciences and Center for Computational Biology, The University of Kansas, Lawrence, Kansas; <sup>2</sup>RIKEN Theoretical Molecular Science Laboratory, Hirosawa, Wako, Saitama, Japan; <sup>3</sup>RIKEN Quantitative Biology Center (QBiC), IMDA 6F, and <sup>4</sup>RIKEN Advanced Institute for Computational Science, Chuo-ku, Kobe, Hyogo Prefecture, Japan; <sup>5</sup>Department of Biochemistry and Molecular Biophysics, Kansas State University, Manhattan, Kansas; <sup>6</sup>Department of Organic Chemistry and Stockholm Center for Biomembrane Research, Arrhenius Laboratory, Stockholm University, Stockholm, Sweden; and <sup>7</sup>Korean Institute of Science and Technology Information, Yuseong-gu, Daejeon, Korea

**ABSTRACT** The asymmetric outer membrane of Gram-negative bacteria is formed of the inner leaflet with phospholipids and the outer leaflet with lipopolysaccharides (LPS). Outer membrane protein F (OmpF) is a trimeric porin responsible for the passive transport of small molecules across the outer membrane of *Escherichia coli*. Here, we report the impact of different levels of heterogeneity in LPS environments on the structure and dynamics of OmpF using all-atom molecular dynamics simulations. The simulations provide insight into the flexibility and dynamics of LPS components that are highly dependent on local environments, with lipid A being the most rigid and O-antigen being the most flexible. Increased flexibility of O-antigen polysaccharides is observed in heterogeneous LPS systems, where the adjacent O-antigen repeating units are weakly interacting and thus more dynamic, compared to homogeneous LPS systems in which LPS interacts strongly with each other with limited overall flexibility due to dense packing. The model systems were validated by comparing molecular-level details of interactions between OmpF surface residues and LPS core sugars with experimental data, establishing the importance of LPS core oligosaccharides in shielding OmpF surface epitopes recognized by monoclonal antibodies. There are LPS environmental influences on the movement of bulk ions ( $K^+$  and  $Cl^-$ ), but the ion selectivity of OmpF is mainly affected by bulk ion concentration.

## INTRODUCTION

The outer membrane (OM) of Gram-negative bacteria is an asymmetric bilayer with phospholipids forming the inner leaflet and lipopolysaccharides (LPS) forming the outer leaflet, and various OM proteins (Omps) populate this membrane (1,2). In *Escherichia coli* and its relatives,  $\sim 10^6$  LPS molecules per cell cover nearly three-quarters of the OM surface (3). An LPS molecule consists of a lipid A moiety embedded in the OM, linked to the oligosaccharide core sugars and the repeating units of the O-antigen polysaccharide (4,5). Lipid A and the core oligosaccharide are phylogenetically conserved regions of LPS, whereas the O-antigen is a hypervariable region that determines bacterial antigenic diversity (6,7). LPS makes the cell surface hydrophilic and acts as a defensive barrier to hydrophobic antibiotics, dyes, and humoral immune responses mediated by antibodies (8,9).

OmpF porin is one of the major Omps and has cation-selective aqueous pores in the *E. coli* OM (Figs. 1 and 2 A) (10). Each monomer of its homotrimeric structure contains a 16-stranded  $\beta$ -barrel with eight reverse turns (T1–T8) on the periplasmic side and eight relatively large

loops (L1–L8) on the cell surface. OmpF, which is present at  $>100,000$  copies/cell, is a passive channel for translocation of hydrophilic solutes of  $<600$  Da across the OM (11). In the trimeric form, OmpF contains a large inlet vestibule that gives rise to a narrow constriction zone in each monomer, creating the shape of a large funnel with its entrance on the cell surface and three outlets into the periplasm. The constriction zone is lined by two acidic residues (Asp113 and Glu117) and an opposing cluster of three basic residues (Arg42, Arg82, and Arg132) (12,13). Sites in the surface-exposed loops (epitopes) of OmpF are recognized by antibodies (Fig. 2 A) (14,15) and also play important roles in the reception and translocation of colicins (bacterial toxins) (16,17).

The bacterial growth environment influences the phenotypic expression of surface characters that may create different protein-LPS and LPS-LPS interactions (9). These different interactions may affect antibody accessibility. For example, based on flow-cytometry immunochemical assays, *rfa* (deep rough) mutants of *E. coli* K12 (Fig. 2 B; Fig. S1 in the Supporting Material) that conferred stepwise truncations in the LPS K12 core showed increasing accessibility to different monoclonal antibodies (mAbs) targeting OmpF surface epitopes (Fig. 2 A) (14,15). Similarly, the permeability of the OM to antibiotics (18) and the binding

Submitted December 3, 2015, and accepted for publication January 5, 2016.

\*Correspondence: [wonpil@ku.edu](mailto:wonpil@ku.edu)

Editor: Scott Feller.

© 2016 by the Biophysical Society  
0006-3495/16/02/0930/9

<http://dx.doi.org/10.1016/j.bpj.2016.01.002>

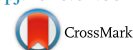

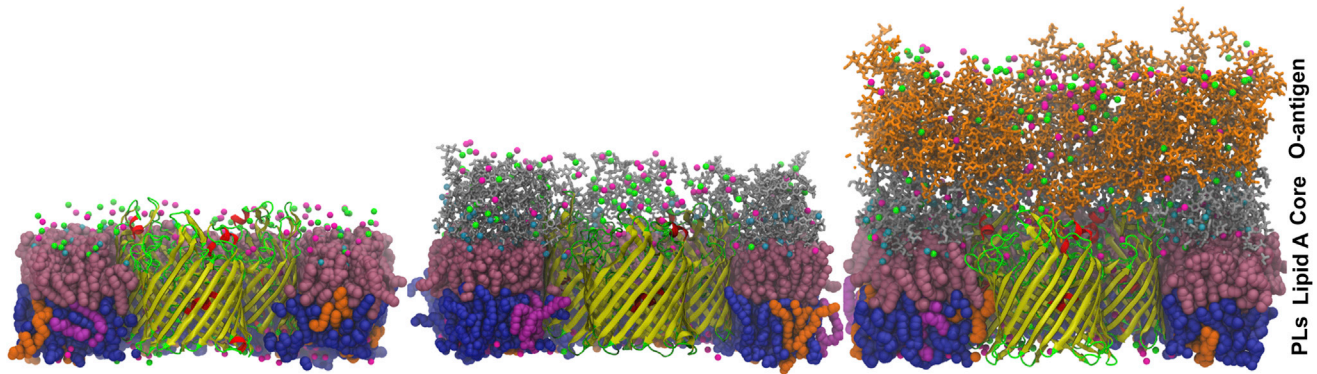

FIGURE 1 Representative snapshots of an OmpF trimer (barrel, yellow; helix, red; loop and turn, green) embedded in OMs of *E. coli* rough LPS (EC-lipa, left), K12 core LPS (K12-lps0, center), and R1 core LPS with five repeating units of O6-antigen (R1-lps5, right). Lipid A is represented as pink spheres, core sugars as gray stick model, and O-antigen polysaccharides as orange stick model. The inner leaflet contains PPPE (blue spheres), PVPG (orange spheres), and PVCL2 (magenta spheres); see the main text for the full names of inner-leaflet phospholipids.  $\text{Ca}^{2+}$  ions are represented as cyan small spheres, potassium ions as green small spheres, and chloride ions as magenta small spheres. For clarity, some portions of the system have been removed. Snapshots were taken at the ends of simulations (~300 ns in K12-lps0 and R1-lps5 systems and ~350 ns in EC-lipa system). To see this figure in color, go online.

and translocation of colicins (17,19) are influenced by bacterial surface determinants. The heterogeneity of O-antigen polysaccharide unit length and the dynamics of their constituent sugars may complicate the accessibility of mAbs to epitopes located either on the cell surface or

deep within the LPS leaflet (14,20). Understanding these protein-LPS interactions at the molecular level is a first step toward explaining how bacteria restrict antibody access or increase antibiotic resistance.

Results of previous experimental and theoretical studies provide insight into the mechanisms of ion and antibiotic permeation through OmpF pores (21–23). Theoretical models also suggest that the ion selectivity of OmpF is not governed completely by the charged residues at the channel constriction, but by the collective action of a large number of residues along the ion permeation pathway (21,24). Although previous results from atomic simulation studies of OmpF (mainly in symmetric phospholipid bilayers) are insightful, a critical need exists to explain the role of LPS in shielding OmpF epitopes from antibody recognition, as well as ion permeation and selectivity in the asymmetric OM environment. In this study, molecular dynamics (MD) simulations of OmpF in different asymmetric OMs (Fig. 1; Table 1; Table S1) 1) elucidate the impact of different LPS molecules on the structure and dynamics of OmpF, and 2) determine the importance of protein-LPS interactions in mAb accessibility and ion permeability in different LPS environments.

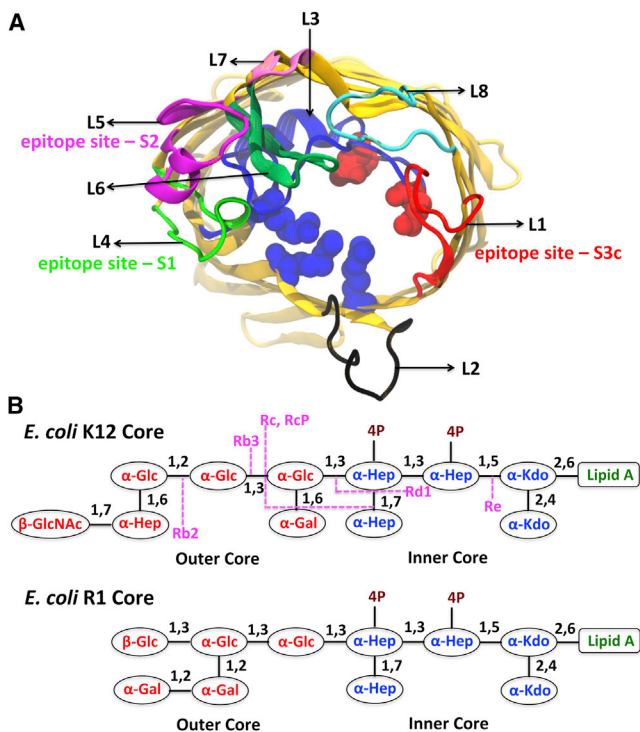

FIGURE 2 (A) Eight loops of OmpF depicted with the estimated OmpF epitopes for mAbs on L1, L4, and L5. Red and blue spheres are acidic and basic residues in the constriction zone. (B) Sequences of K12 (depicted with different mutations) and R1 LPS cores considered in this study. The inner core consists of rare sugars, 2-keto-3-deoxyoctulosonate (Kdo) and L-glycero-D-manno-heptose (Hep), and the outer core consists mainly of D-glucose (Glc), D-galactose (Gal), and N-acetyl-D-glucosamine (GlcNAc). To see this figure in color, go online.

## MATERIALS AND METHODS

### System setup

The OmpF trimer structure (PDB: 2OMF) was embedded in various asymmetric bilayers mimicking *E. coli* OMs (Fig. 1). Building and assembly of OmpF/OM systems were achieved by the step-by-step protocol developed by Im and co-workers (25–27) based on the procedure in CHARMM-GUI Membrane Builder (28–31). The phospholipid composition of the inner leaflet of the *E. coli* OM is reported to be similar to that of the inner (cytoplasmic) membrane, comprised of 75–85% phosphatidylethanolamine, 10–20% phosphatidylglycerol, and 5–15% cardiolipin (32,33). Based on these reports, we chose a ratio of 15:4:1 of 1-palmitoyl(16:0)-2-palmitoleoyl(16:1 cis-9)-phosphatidylethanolamine

(PPPE, 75%)/1-palmitoyl(16:0)-2-vacenoyl(18:1 cis-11)-phosphatidylglycerol (PVPG, 20%)/1,10-palmitoyl-2,20-vacenoyl cardiolipin with a net charge of  $-2e$  (PVCL2, 5%). The outer leaflets vary in composition, and different OM systems are named based on the outer-leaflet composition (Table 1). The system size and composition are summarized in Table S1. As shown in Fig. 1, the complexity increases with involvement of oligosaccharide cores and O-antigen polysaccharides (*E. coli* O6) compared to a rough LPS system (i.e., EC-lipa). As a reference, we also built and simulated an OmpF system in a symmetric bilayer with 1,2-dimyristoyl(14:0)-phosphatidylcholine (DMPC).

## MD simulations

All membrane systems were equilibrated for 450 ps using CHARMM (34) with the C36 force field for lipids (35) and carbohydrates (36–38) and the TIP3P water model (39). We used a 2-fs time step together with the SHAKE algorithm (40). NVT (constant particle number, volume, and temperature) and NPT (constant particle number, pressure, and temperature) CHARMM equilibrations were followed by a 300- to 350-ns NPT production run for all systems using NAMD (41) with the NAMD input scripts generated by CHARMM-GUI (42). The van der Waals interactions were smoothly switched off at 10–12 Å by a force-switching function (43), whereas the long-range electrostatic interactions were calculated using the particle mesh Ewald method (44). The temperature and pressure were held at 310.15 K and 1 bar, respectively. In CHARMM equilibration simulations, Langevin temperature control was used for NVT dynamics, and a Hoover thermostat (45) and Langevin piston were used to control temperature and pressure for NPT dynamics (46,47). In the NAMD production run, Langevin dynamics was used to maintain constant temperature with a Langevin coupling coefficient of  $1 \text{ ps}^{-1}$ , and a Nosé-Hoover Langevin piston (48,49) was used to maintain constant pressure with a piston period of 50 fs and a piston decay time of 25 fs. The assembled systems were equilibrated by the well-established protocol in Membrane Builder, in which various planar and dihedral restraints were applied to the LPS molecules, phospholipids, and water molecules, and the restraint forces were gradually reduced during this process (see (25–27) for details). Additional dihedral angle restraints were applied to restrain all sugar rings to the pertinent chair conformation, and these restraints were maintained during the production simulations. The last-200-ns trajectory of each system was analyzed to obtain average structural properties. The profiles of the diffusion constants of  $\text{K}^+$  and  $\text{Cl}^-$  along the channel axis were calculated using  $D(z) = \langle |\Delta z(t) - \langle \Delta z(t) \rangle|^2 \rangle / 2\tau$ , where  $\Delta z(t) = z(t + \tau) - z(t)$ , and  $\tau$  was set to 10 ps (23).

## RESULTS AND DISCUSSION

### OmpF structure and dynamics in the *E. coli* OM

The structural stability of OmpF in different LPS environments was measured in terms of the root mean-square devi-

ations (RMSDs) of main structural elements—backbone, side chain, barrel, loop, and turn atoms—with respect to the crystal structure (Table S2; Fig. S2). The entire-backbone RMSDs are  $\sim 2$  Å, indicating that OmpF has no significant difference in structural stability in all systems. The transmembrane  $\beta$ -barrel shows smaller RMSDs compared to those in the extracellular loops (L1–L8) and periplasmic turns (T1–T8). Consistent with the RMSD results, there are smaller RMS fluctuations (RMSFs) in the  $\beta$ -barrel residues (Fig. S3), but residues in the extracellular loops show more fluctuations and a slight dependency on the surrounding environment. Compared to the DMPC system, where the OmpF extracellular loops show large fluctuations, some extracellular loops (e.g., L7 and L8) are less flexible in the homogeneous LPS systems, where protein-LPS interactions are tight (mainly due to well maintained salt-bridge interactions of negatively charged  $\text{PO}_4^{2-}$  and  $\text{COO}^-$  groups from Hep and Kdo inner-core sugars with the Lys and Arg residues that are prominently located on the outer surface of OmpF (Fig. S4)). In addition to OmpF-LPS interactions that are dynamic in nature, intraprotein (within a monomer) and interprotein (monomer-monomer) interactions also contribute to the overall structure and dynamics of the loops in all the systems, including the DMPC system. For example, as is evident from the crystal trimeric structure (11), some residues in loop L2 form strong polar interactions with several residues in loops L3 and L4 of the neighboring monomer. Relative stabilization of both L7 and L8 loops was observed with inclusion of LPS environments in the homogeneous systems. For example, the RMSF peak in loop L7 residue Gly285 in DMPC is 2.13 Å, whereas the values are  $\sim 1.5$  Å for the same residue in K12-lps0 and R1-lps0 systems. This is also evident from the interaction pattern analysis showing LPS core sugars interacting with L7 loop residues (vide infra). Similarly, for loop L8, the average RMSF for residues 320–325 is 1.15 Å in DMPC but decreases to  $\sim 0.8$  Å in the K12-lps0 and R1-lps0 systems. Even for loop L6, interactions with LPS core sugars partially stabilize residues 243–245, whose average RMSF in DMPC is 2.5 Å (with the peak at 2.81 Å), whereas those in K12-lps0 and R1-lps0 systems are  $\sim 1.5$  Å (with the peak at  $\sim 1.6$  Å). For similar reasons, the extracellular loops in the homogeneous LPS systems show lesser fluctuation than those in the EC-lipa and heterogeneous mixed LPS systems.

Although the overall RMSFs from the MD simulations and those estimated from the crystallographic B-factors are in good agreement (Fig. S3), some discrepancies are observed, such as larger fluctuations in loop L3 near the constriction zone. The short polypeptide segment 117–121 (EFGGD) in L3 is more flexible in simulations and thus shows deviations relative to the crystallographic structure (Fig. S5). These discrepancies may arise from a different choice of protonation states of Glu296, Asp312, and Asp127, which can lead to restricted motion of L3. In

**TABLE 1** *E. coli* OM Systems and Their Outer-Leaflet Composition

| System            | Composition of Outer Leaflet                 |
|-------------------|----------------------------------------------|
| EC-lipa           | lipid A                                      |
| K12-lps0          | EC-lipa + K12 core oligosaccharides          |
| R1-lps0           | EC-lipa + R1 core oligosaccharides           |
| R1-lps5           | R1-lps0 + five repeating unit of O6-antigen  |
| R1-lipa-lps5      | mixed LPS with EC-lipa and R1-lps5           |
| R1-lps0-lps5      | mixed LPS with R1-lps0 and R1-lps5           |
| R1-lipa-lps0-lps5 | mixed LPS with EC-lipa, R1-lps0, and R1-lps5 |



our study, we used protonated Glu296 and Asp312 and charged Asp127 (23), but Varma et al. reported a low RMSF of the L3 loop when they used protonated Glu296 and charged Asp127 and Asp312 for their 10-ns MD simulation (50). Nonetheless, fluctuation in this part of loop L3 was reported to be responsible for changes in the pore size (11).

### Dynamics and flexibility of LPS in the *E. coli* OM

To examine dynamic behaviors of LPS that may complicate accessibility to epitopes (14,20), we calculated the 2D-density profiles of the centers of mass of LPS molecules (lipid A and core sugars) in the outer leaflet and those of phospholipids in the inner leaflet in the R1-lps5 system (Fig. 3). Within the simulation timescale (~300 ns), LPS molecules are highly immobile and show little translocation, whereas fast diffusions of phospholipids make the phospholipid density uniform in the inner leaflet, which is similar in other systems and consistent with previous computational studies (26,51). The rigidity and low mobility of lipid A and core sugars are mainly attributed to the divalent ( $\text{Ca}^{2+}$ ) ion-mediated cross-linking electrostatic interaction networks with negatively charged  $\text{PO}_4^{2-}$  and  $\text{COO}^-$  groups in the lipid A and core regions. Such immobility may be characteristic for LPS in the OM, as many experiments suggest rigidity in LPS mobility (25,52). In fact, it has been suggested that divalent cations bridging with LPS are responsible for the strong barrier for hydrophobic molecules in most Gram-negative bacteria (9,53).

In contrast to lipid A and core oligosaccharides, O-antigen polysaccharide units are very flexible, as shown in Figs. 4 and S6. In general, the average flexibility of O-antigen repeating units sequentially increases from antigen1 (attached to the outer core) to antigen5, where the width of conformational space increases along the  $z$  axis. The flexibility of O-antigen repeating units is dependent on its local environment and its concentration. In R1-lps5, the O-antigen repeating units, which are farther from the gap created by OmpF, are densely packed along the  $z$  axis and strongly interact with each other. However, the O-antigen repeating units closer to this gap (i.e., above OmpF) have weaker interactions and thus tilt or bend. This is evident in the broader

conformational distributions of some representative O-antigens, as shown in Fig. S7. In mixed LPS systems, the weakly interacting O-antigen repeating units lead to broader conformational distributions. Our previous simulations suggest that the glycosidic torsion angles at the disaccharide level in each O-antigen repeating unit are quite well defined and maintain similar values in homogeneous and heterogeneous LPS bilayer systems (25,26). A collective change in a large number of glycosidic torsion angles of the O-antigen region, resulting in bending, twisting, and/or tilting, are thus responsible for the increased O-antigen flexibility in going from antigen1 to antigen5, as well as in densely packed versus mixed LPS environments. Such O-antigen flexibility may hinder direct access of mAbs to OmpF surface epitopes.

### Protein-LPS interactions and accessibility of OmpF surface epitopes

Experimental data (Fig. S1; Table 2) indicate that stepwise truncations of the K12 core increase the number of different mAbs that bind to OmpF; i.e., these epitope sites become more accessible to mAbs by removal of core sugars that interact with the sites and thus block mAb binding. To explore the molecular details of OmpF's surface availability to mAbs, we characterized the interaction patterns of each OmpF residue with each component of lipid molecules, water, or residues of adjacent OmpF monomers. For this analysis, we used a distance cutoff of 5 Å to define an interaction between any heavy atom of each OmpF residue and that of each environmental moiety. The average result of the OmpF trimer in K12-lps0 system is shown in Fig. 5 and those in other systems are given in Fig. S8, A–G. For all LPS systems, the interaction analysis shows three main characteristics: 1) the transmembrane  $\beta$ -strands mainly interact with lipid A, the phospholipid tail, or adjacent protein monomers; 2) the extracellular loops prefer to interact with LPS core oligosaccharides and water, except for loop L2, whose residues also participate in interactions with neighboring monomers; and 3) the turns mainly interact with phospholipid headgroups and water. Table 2 summarizes the comparison of the interaction patterns in the K12-lps0 system with experimental binding activities of three mAb groups (S1, S2, and S3c). Both the experiment

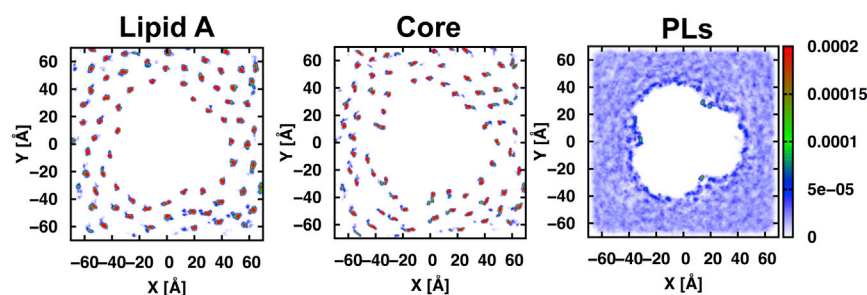

FIGURE 3 2D number density plots of the centers of mass of the outer-leaflet molecules (lipid A and core sugars) and the inner-leaflet phospholipids (PPPE, PVPE, and PVCL2) in the R1-lps5 system. The 2D plots were constructed with a grid spacing of 0.5 Å. To see this figure in color, go online.



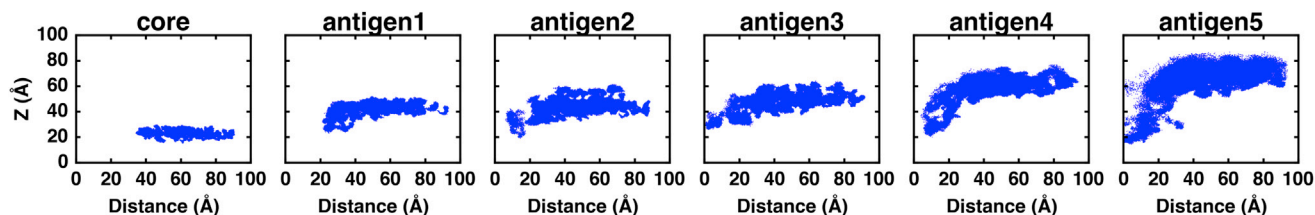

FIGURE 4 Flexibility of the O-antigens. 2D scatter plots of the centers of mass of core and O-antigen repeating units along the  $z$  axis and the distance from the center of mass of the OmpF trimer in the R1-lps5 system. The bilayer is recentered to  $z = 0$ . To see this figure in color, go online.

and MD simulations show the importance of LPS core sugars in shielding OmpF surface epitopes recognized by various mAbs (14,15).

Most residues in loop L4 interact with water molecules instead of LPS sugars (Fig. 5), indicating that this epitope site is available for easy access to group S1 mAbs, which agrees with the experimental data. Certain residues in L4 also interact with loop L2 in adjacent monomers. These interprotein interactions may maintain the functional conformation of the OmpF trimer to which group S1 mAbs bind, which is also evident from the immunological assays, showing weak interactions of these antibodies with monomeric OmpF (15). Different interaction patterns of L5 residues suggest accessibility variations in these residues as targets for group S2 mAbs. These data support the argument that the reported mAb activity differences are attributed to binding of S2 mAbs to different epitope sites on L5 (Fig. 2; Fig. S1). For example, mAb 15 showing full activity against wild-type K12 may bind to L5 residues with full exposure to water, whereas mAb 69 may bind to residues that interact with the deep inner-core sugar residues, as mAb 69 only showed full activity when the LPS core was truncated to the Re level. Similarly, variable interactions of L1 residues with inner- and outer-core sugars (Fig. 5) may explain the distinct level of mAb 60 activities (S3c group): no binding to Rb2 core, low activity in Rb3 to Rd1 core, and full activity with K12 truncated to the Re level (Fig. 2; Fig. S1). In general, the predicted interaction patterns between epitope residues and *E. coli* K12 core sugars confirm the experimental find-

ings, indicating a sequential increase in the number of mAbs that can access the epitope sites with truncation of the LPS core length.

The interaction patterns in EC-lipa and DMPC systems (Fig. S8, A and B) show complete exposure of epitope-site residues to water, and these sites are always available for mAbs binding. This clearly indicates a role of LPS core sugars in restricting mAb binding; it also suggests a key limitation of these model systems, which shows a lack of influence of protein-LPS interactions on dynamics, permeability, and binding of antibiotics or colicin on the OmpF surface.

The interaction pattern analysis also suggests that mAb binding to surface epitopes in *E. coli* R1 core environments (Fig. S8 C) is similar to that in *E. coli* K12 environments (Fig. 5; Fig. S9). Loop L1 Asn30 shows similar H-bonding interactions with the outer core sugars, i.e.,  $\alpha$ -Glc in the K12-lps0 system (Fig. S9 A) and terminal  $\alpha$ -Gal and  $\alpha/\beta$ -Glc in the R1-lps0 system (Fig. S9 C). Similarly, loop L5 Lys209 interacts with the inner-core  $\alpha$ -Hep via H-bonding in both systems (Fig. S9, B and D). The two systems also show minor differences (mainly due to outer-core sugars); notably, H-bonding interactions of the K12 outer-core  $\alpha$ -Gal with L1 Gly28 and L5 Asn207 (Fig. S9, A and B) are missing in the R1-lps0 system (Fig. S9, C and D). The experimental data show that truncation of  $\alpha$ -Gal and  $\alpha$ -Hep in the K12 core (Rc mutation) facilitates access of mAbs 5 and 9 to epitope sites on loop L5 (Fig. 2; Fig. S1). Therefore, both mAbs may show different activities in the R1 core, although there is no experimental

**TABLE 2** Experimental Binding Activities of mAbs Compared to Overall Interaction Patterns of LPS to Epitope Sites in the K12-lps0 System

| Group | mAb                | Epitope-Site Residues (Loop) | Experimental Analysis                                                           | MD Analysis                                                                                                                                |
|-------|--------------------|------------------------------|---------------------------------------------------------------------------------|--------------------------------------------------------------------------------------------------------------------------------------------|
| S1    | 2, 10, 12, 14      | 160–172 (L4)                 | high binding activities in both wild-type and mutant <i>E. coli</i> K12 strains | epitope-site residues mainly interact with water and not with LPS sugars; some residues also interact with loop L2 of neighboring monomers |
| S2    | 15, 8, 4, 5, 9, 69 | 195–212 (L5)                 | sequentially increasing activities in wild-type to Re LPS                       | epitope-site residues interact with both inner and outer core sugars, and some residues are fully exposed to water                         |
| S3c   | 60                 | 25–31 (L1)                   | moderate activities for Rb3 to Rd1 LPS but high activity for truncated Re LPS   | epitope-site residues interact with inner- and outer-core sugars, and some are fully exposed to water                                      |

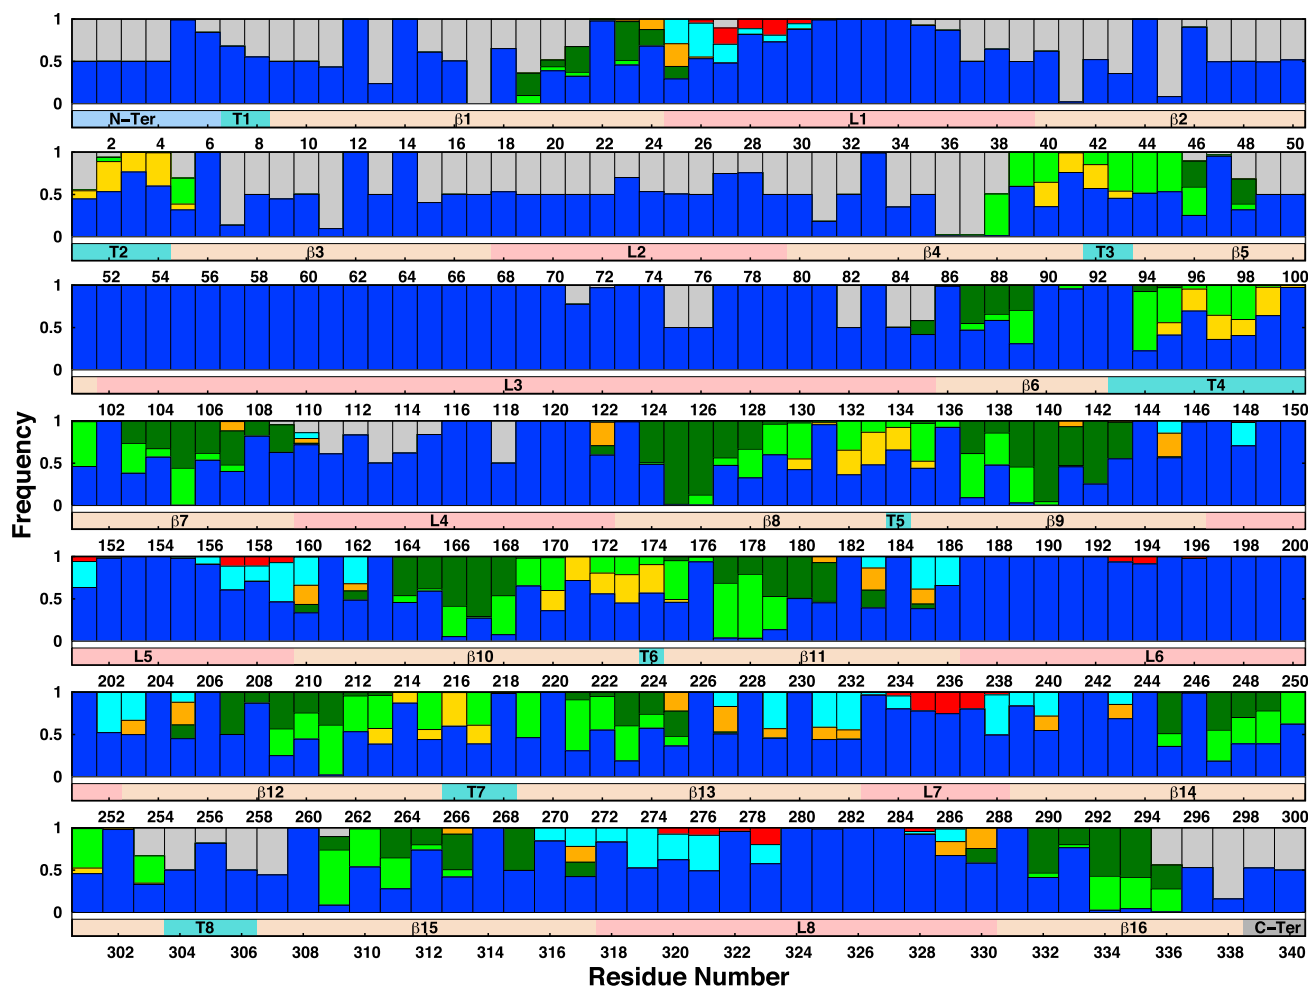

FIGURE 5 Interaction patterns of OmpF protein residues with their surrounding environments in K12-lps0. The graph shows, for each residue, the frequency of interactions with another monomer (*gray*), water molecules (*blue*), a phospholipid headgroup (*yellow*), a phospholipid carbon tail (*green*), a lipid A tail (*dark green*), a lipid A headgroup (*orange*), the LPS inner core (*cyan*), or the LPS outer core (*red*). An interaction is first counted when the distance between any heavy atom of a residue and that of its interacting partner is  $<5 \text{ \AA}$  and is normalized for each interacting partner. The bar below each set of patterns indicates the protein secondary structure. To see this figure in color, go online.

evidence for specific binding sites, nor are there data for cross reactivity with other cores, for any of the mAbs discussed in this study.

The core sugar residues in the R1-lps5 system (Fig. S8 D) are also found to maintain interaction patterns similar to those in the R1-lps0 system. As expected, an increase in the hydrophilic layer of O-antigen polysaccharides creates more steric hindrance to mAb accessibility to the epitope sites. Previous experimental studies also show that the presence of O-antigen polysaccharides restricts adsorption of mAbs to protein surface epitopes (14,20). Importantly, in the R1-lps5 system, O-antigen units closer to OmpF are highly flexible and occupy the gap created by OmpF in the LPS layer. In other words, the O-antigen units interact directly with the surface epitopes and provide a denser hydrophilic environment above the OmpF vestibule (Fig. 6; Fig. S8 D and Movie S1). This further ensures strong steric and electrostatic hindrance to mAbs.

For mixed-LPS systems, interactions between epitope sites and LPS (Fig. S8, E–G) are dependent on surrounding LPS molecules and their conformational flexibility to cover the protein surface. Because of the significantly slow translation and rotation of the LPS molecules, as well as limited simulation time, these interaction patterns could depend on the initial placement and the type of LPS composition surrounding the OmpF. In addition, the mixed LPS systems described here certainly do not represent all possible LPS heterogeneities on the OM, in which there are often more than five O-antigen units. In our models, the OmpF vestibule is less covered by O-antigen units in mixed-LPS model systems compared to the R1-lps5 system (Fig. 6). This less dense environment of O-antigen polysaccharides above OmpF pores may be exploited by the antibacterial toxin colicin-N. Such situations provide support for the hypothetical model of colicin-N binding to core sugars envisaged by Johnson et al. (19), because the gap in the

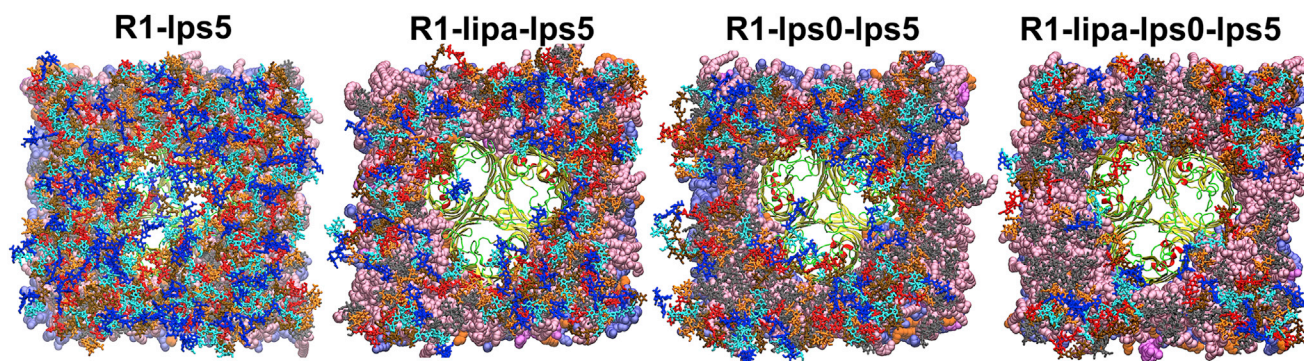

FIGURE 6 Snapshots (*top views*) of O-antigen polysaccharides in R1-lps5, R1-lipa-lps5, R1-lps0-lps5, and R1-lipa-lps0-lps5 systems with inner core (gray), antigen1 (orange), antigen2 (red), antigen3 (ochre), antigen4 (cyan), and antigen5 (blue) stick-model representation. For clarity, ions and water molecules are not shown. Snapshots were taken at the ends of simulations (~300 ns). To see this figure in color, go online.

mixed-LPS layer may expose the required LPS binding site (inner-core  $\alpha$ -Hep and first  $\alpha$ -Glc of the outer core) of colicin-N at the protein-LPS interface.

### Ion permeation and selectivity of OmpF in the OM

The average numbers of  $K^+$  and  $Cl^-$  ions in each pore and their occupancy ratio ( $N_K/N_{Cl}$ ) are given in Table S3 for all systems. The ion distribution inside each pore is similar to those found in earlier OmpF simulation studies, such as slight cation selectivity and a screw-like separation of  $K^+$  and  $Cl^-$  ion permeation pathways (Fig. S10 A) that extend over the height of the  $\beta$ -barrel (21–23,54–56). A larger number of ions is found on the periplasmic side than on the extracellular side because of the asymmetric pore shape.

We note that  $N_K$  and  $N_{Cl}$  are slightly different in all systems (Table S3) because of the redistribution of ions initially placed above the LPS layer, leading to different effective bulk KCl concentrations ( $[KCl]_{eff}$ ). Notably, as shown in Fig. S10, B and C,  $N_K$  and  $N_{Cl}$  are linearly correlated with  $[KCl]_{eff}$ , suggesting that if all systems were at the identical  $[KCl]_{eff}$ ,  $N_K$  and  $N_{Cl}$  would not be varied, and that LPS contributes very little to  $N_K$  and  $N_{Cl}$ . Assuming that  $N_K/N_{Cl}$  in Table S3 is representative of the channel selectivity at a given concentration, this ratio also confirms OmpF's preferred selectivity for  $K^+$  over  $Cl^-$  in all systems. In addition, the dependence of  $N_K/N_{Cl}$  on  $[KCl]_{eff}$  is clearly reflected. For example, in R1-lps5 system (where  $[KCl]_{eff}$  is estimated to be 1 M),  $N_K/N_{Cl}$  is 1.36, whereas in R1-lipa-lps0-lps5 (where  $[KCl]_{eff}$  is estimated to be 0.35 M),  $N_K/N_{Cl}$  is 2.18. Such concentration dependency of OmpF's ion selectivity was also observed in previous experimental and computational studies, indicating that OmpF cation selectivity increases as salt concentration decreases, due to less ionic screening of the electrostatic field of OmpF (22).

Consistent with a previously observed trend, the diffusion constants of  $K^+$  and  $Cl^-$  (Fig. S11, A and B) are decreased by >50% in the pore relative to their values in bulk solvent (23). The restricted ion movement in the pores is attributed

to the limited hydrodynamic ion permeation pathway, as documented by previous studies (21,23,57). It was noteworthy that systems with O-antigen polysaccharides, such as R1-lps5, show further-restricted ion movement in the outer leaflet compared to the inner leaflet. This likely arises from increased hindrance to the ion permeation due to molecular crowding of LPS, as observed in pure-LPS-bilayer simulations (25). On the other hand, less pronounced molecular crowding of O-antigen units may allow less restricted movement of ions in heterogeneous mixed-LPS systems. Therefore, LPS does affect ion (potentially other solutes') diffusion into the OmpF pore, but not the fundamental selectivity (or solute permeation, although LPS O-antigen sugars can shield the OmpF pore (Fig. 6)).

### CONCLUSIONS

We investigated the influence of different LPS environments on the structure and dynamics of OmpF porin, accessibility of mAbs, and ion permeability and selectivity using all-atom MD simulations. In consideration of the flexibility and dynamics of LPS components, lipid A (headgroup) is the most rigid and O-antigen is the most flexible. In the heterogeneous systems, where the adjacent O-antigen molecules have weak interactions, they show more flexibility and dynamics, whereas the flexibility is greatly reduced for the closely packed O-antigen molecules in homogeneous systems. Consistent with the experimental data, calculated interaction patterns between OmpF residues and LPS K12 core sugars show the importance of LPS core sugars in shielding OmpF surface epitopes recognized by mAbs. With inclusion of O-antigen polysaccharides, access to epitope sites by mAbs is further occluded. Heterogeneous mixed-LPS compositions, which are considered to be more biologically relevant, show that interactions between LPS and epitope sites are dependent on surrounding lipid molecules and their conformational flexibility to cover the protein surface. In addition, interaction patterns in EC-lipa and DMPC systems indicate a key limitation to incorporating



genuine protein-LPS (core and O-antigen sugars) interactions, which in turn cannot capture the influence of such interactions on dynamics, permeability, and binding of mAbs, antibiotics, and colicin on the OmpF surface. Ion ( $K^+$  and  $Cl^-$ ) movements in the extracellular vestibule are restricted (slower diffusion) due to LPS crowding, but the cation selectivity ( $N_K/N_{Cl}$ ) is mainly affected by the bulk concentration of ions.

In summary, bacteria produce OM porins to facilitate passive nutrient uptake. Porin surface epitopes are antigenic and hence potentially disadvantageous in the host as a result of immune recognition. However, LPS sugars sterically hinder antibody access to OM protein epitopes, allowing bacterial invasion into eukaryotic hosts. This point was already well known 25 years ago from experiments on the impact of LPS O-antigen and core structure on the binding of anti-OmpF mAbs (14). Our results computationally explain the ability of LPS sugars to interact with specific regions of the OmpF polypeptide in a way that camouflages and shields its epitopes from immune recognition without compromising OmpF channel activity. Therefore, the findings reported herein provide computational synergy with existing experimental data, explaining in molecular terms how and why LPS shields porin epitopes.

## SUPPORTING MATERIAL

Eleven figures, three tables, and one movie are available at [http://www.biophysj.org/biophysj/supplemental/S0006-3495\(16\)00008-4](http://www.biophysj.org/biophysj/supplemental/S0006-3495(16)00008-4).

## AUTHOR CONTRIBUTIONS

D.S.P. and W.I. conceived the study and wrote the manuscript; D.S.P., S.R., E.L.W., and Y.Q. performed the research; D.S.P., S.R., E.L.W., Y.Q., Y.S., P.E.K., G.W., M.S.Y., and W.I. analyzed the data; All authors contributed to editing the manuscript.

## ACKNOWLEDGMENTS

This work was supported in part by grants from the National Science Foundation (MCB-1516154, DBI-1145987, NSF IIA-1359530, and XSEDE MCB070009 to W.I. and MCB0952299 to P.E.K.), the Human Frontier Science Program (HFSP RGP0064/2011 to W.I.), the National Institute of Supercomputing and Networking/Korea Institute of Science and Technology Information, with supercomputing resources including technical support (KSC-2015-C3-004 to M.S.Y.), the Swedish Research Council and Stockholm Center for Biomembrane Research/Swedish Foundation for Strategic Research (to G.W.), and the National Institutes of Health (GM53836 and AI115187 to P.E.K.).

## REFERENCES

- Ruiz, N., D. Kahne, and T. J. Silhavy. 2006. Advances in understanding bacterial outer-membrane biogenesis. *Nat. Rev. Microbiol.* 4:57–66.
- Bos, M. P., V. Robert, and J. Tommassen. 2007. Biogenesis of the gram-negative bacterial outer membrane. *Annu. Rev. Microbiol.* 61:191–214.
- Rietschel, E. T., T. Kirikae, ..., H. Brade. 1994. Bacterial endotoxin: molecular relationships of structure to activity and function. *FASEB J.* 8:217–225.
- Raetz, C. R. H., and C. Whitfield. 2002. Lipopolysaccharide endotoxins. *Annu. Rev. Biochem.* 71:635–700.
- Erridge, C., E. Bennett-Guerrero, and I. R. Poxton. 2002. Structure and function of lipopolysaccharides. *Microbes Infect.* 4:837–851.
- Akira, S., S. Uematsu, and O. Takeuchi. 2006. Pathogen recognition and innate immunity. *Cell.* 124:783–801.
- Wang, X., and P. J. Quinn. 2010. Lipopolysaccharide: biosynthetic pathway and structure modification. *Prog. Lipid Res.* 49:97–107.
- Hancock, R. E. W. 1984. Alterations in outer membrane permeability. *Annu. Rev. Microbiol.* 38:237–264.
- Nikaïdo, H., and M. Vaara. 1985. Molecular basis of bacterial outer membrane permeability. *Microbiol. Rev.* 49:1–32.
- Dhakshnamoorthy, B., S. Raychaudhury, ..., B. Roux. 2010. Cation-selective pathway of OmpF porin revealed by anomalous x-ray diffraction. *J. Mol. Biol.* 396:293–300.
- Cowan, S. W., R. M. Garavito, ..., T. Schirmer. 1995. The structure of OmpF porin in a tetragonal crystal form. *Structure.* 3:1041–1050.
- Phale, P. S., T. Schirmer, ..., J. P. Rosenbusch. 1997. Voltage gating of *Escherichia coli* porin channels: role of the constriction loop. *Proc. Natl. Acad. Sci. USA.* 94:6741–6745.
- Phale, P. S., A. Philippsen, ..., T. Schirmer. 2001. Role of charged residues at the OmpF porin channel constriction probed by mutagenesis and simulation. *Biochemistry.* 40:6319–6325.
- Bentley, A. T., and P. E. Klebba. 1988. Effect of lipopolysaccharide structure on reactivity of antiporin monoclonal antibodies with the bacterial cell surface. *J. Bacteriol.* 170:1063–1068.
- Klebba, P. E., S. A. Benson, ..., H. Nikaïdo. 1990. Determinants of OmpF porin antigenicity and structure. *J. Biol. Chem.* 265:6800–6810.
- Fourel, D., S. Mizushima, ..., J. M. Pagès. 1993. Specific regions of *Escherichia coli* OmpF protein involved in antigenic and colicin receptor sites and in stable trimerization. *J. Bacteriol.* 175:2754–2757.
- Jakes, K. S. 2014. Daring to be different: colicin N finds another way. *Mol. Microbiol.* 92:435–439.
- Delcour, A. H. 2009. Outer membrane permeability and antibiotic resistance. *Biochim. Biophys. Acta.* 1794:808–816.
- Johnson, C. L., H. Ridley, ..., J. H. Lakey. 2014. The antibacterial toxin colicin N binds to the inner core of lipopolysaccharide and close to its translocator protein. *Mol. Microbiol.* 92:440–452.
- van der Ley, P., O. Kuipers, ..., B. Lugtenberg. 1986. O-antigenic chains of lipopolysaccharide prevent binding of antibody molecules to an outer membrane pore protein in *Enterobacteriaceae*. *Microb. Pathog.* 1:43–49.
- Dhakshnamoorthy, B., B. K. Ziervogel, ..., B. Roux. 2013. A structural study of ion permeation in OmpF porin from anomalous x-ray diffraction and molecular dynamics simulations. *J. Am. Chem. Soc.* 135:16561–16568.
- Im, W., and B. Roux. 2002. Ion permeation and selectivity of OmpF porin: a theoretical study based on molecular dynamics, Brownian dynamics, and continuum electrodiffusion theory. *J. Mol. Biol.* 322:851–869.
- Im, W., and B. Roux. 2002. Ions and counterions in a biological channel: a molecular dynamics simulation of OmpF porin from *Escherichia coli* in an explicit membrane with 1 M KCl aqueous salt solution. *J. Mol. Biol.* 319:1177–1197.
- Aguilella, V. M., M. Queralt-Martín, ..., A. Alcaraz. 2011. Insights on the permeability of wide protein channels: measurement and interpretation of ion selectivity. *Integr. Biol. (Camb).* 3:159–172.
- Wu, E. L., O. Engström, ..., W. Im. 2013. Molecular dynamics and NMR spectroscopy studies of *E. coli* lipopolysaccharide structure and dynamics. *Biophys. J.* 105:1444–1455.
- Wu, E. L., P. J. Fleming, ..., W. Im. 2014. *E. coli* outer membrane and interactions with OmpLA. *Biophys. J.* 106:2493–2502.

27. Jo, S., E. L. Wu, ..., W. Im. 2015. Lipopolysaccharide membrane building and simulation. *Methods Mol. Biol.* 1273:391–406.
28. Jo, S., T. Kim, and W. Im. 2007. Automated builder and database of protein/membrane complexes for molecular dynamics simulations. *PLoS One.* 2:e880.
29. Jo, S., T. Kim, ..., W. Im. 2008. CHARMM-GUI: a web-based graphical user interface for CHARMM. *J. Comput. Chem.* 29:1859–1865.
30. Jo, S., J. B. Lim, ..., W. Im. 2009. CHARMM-GUI Membrane Builder for mixed bilayers and its application to yeast membranes. *Biophys. J.* 97:50–58.
31. Wu, E. L., X. Cheng, ..., W. Im. 2014. CHARMM-GUI Membrane Builder toward realistic biological membrane simulations. *J. Comput. Chem.* 35:1997–2004.
32. Raetz, C. R. H. 1978. Enzymology, genetics, and regulation of membrane phospholipid synthesis in *Escherichia coli*. *Microbiol. Rev.* 42:614–659.
33. Vance, D. E., and J. E. Vance. 2002. Biochemistry of Lipids, Lipoproteins, and Membranes. Elsevier, Amsterdam.
34. Brooks, B. R., C. L. Brooks, 3rd, ..., M. Karplus. 2009. CHARMM: the biomolecular simulation program. *J. Comput. Chem.* 30:1545–1614.
35. Klauda, J. B., R. M. Venable, ..., R. W. Pastor. 2010. Update of the CHARMM all-atom additive force field for lipids: validation on six lipid types. *J. Phys. Chem. B.* 114:7830–7843.
36. Guvench, O., E. R. Hatcher, ..., A. D. Mackerell. 2009. CHARMM additive all-atom force field for glycosidic linkages between hexopyranoses. *J. Chem. Theory Comput.* 5:2353–2370.
37. Guvench, O., S. S. Mallajosyula, ..., A. D. Mackerell, Jr. 2011. CHARMM additive all-atom force field for carbohydrate derivatives and its utility in polysaccharide and carbohydrate-protein modeling. *J. Chem. Theory Comput.* 7:3162–3180.
38. Guvench, O., S. N. Greene, ..., A. D. Mackerell, Jr. 2008. Additive empirical force field for hexopyranose monosaccharides. *J. Comput. Chem.* 29:2543–2564.
39. Jorgensen, W. L., J. Chandrasekhar, ..., M. L. Klein. 1983. Comparison of simple potential functions for simulating liquid water. *J. Chem. Phys.* 79:926–935.
40. Ryckaert, J. P., G. Ciccotti, and H. J. C. Berendsen. 1977. Numerical integration of cartesian equations of motion of a system with constraints - molecular dynamics of *n*-alkanes. *J. Comput. Phys.* 23:327–341.
41. Phillips, J. C., R. Braun, ..., K. Schulten. 2005. Scalable molecular dynamics with NAMD. *J. Comput. Chem.* 26:1781–1802.
42. Lee, J., X. Cheng, ..., W. Im. 2016. CHARMM-GUI input generator for NAMD, GROMACS, AMBER, OpenMM, and CHARMM/OpenMM simulations using the CHARMM36 additive force field. *J. Chem. Theory Comput.* 12:405–413.
43. Steinbach, P. J., and B. R. Brooks. 1994. New spherical cutoff methods for long-range forces in macromolecular simulation. *J. Comput. Chem.* 15:667–683.
44. Essmann, U., L. Perera, ..., L. G. Pedersen. 1995. A smooth particle mesh Ewald method. *J. Chem. Phys.* 103:8577–8593.
45. Hoover, W. G. 1985. Canonical dynamics: equilibrium phase-space distributions. *Phys. Rev. A.* 31:1695–1697.
46. Andersen, H. C. 1980. Molecular dynamics simulations at constant pressure and/or temperature. *J. Chem. Phys.* 72:2384–2393.
47. Nosé, S., and M. L. Klein. 1983. A study of solid and liquid carbon tetrafluoride using the constant pressure molecular dynamics technique. *J. Chem. Phys.* 78:6928–6939.
48. Feller, S. E., Y. H. Zhang, ..., B. R. Brooks. 1995. Constant pressure molecular dynamics simulation - The langevin piston method. *J. Chem. Phys.* 103:4613–4621.
49. Martyna, G. J., D. J. Tobias, and M. L. Klein. 1994. Constant pressure molecular dynamics algorithms. *J. Chem. Phys.* 101:4177–4189.
50. Varma, S., S. W. Chiu, and E. Jakobsson. 2006. The influence of amino acid protonation states on molecular dynamics simulations of the bacterial porin OmpF. *Biophys. J.* 90:112–123.
51. Piggot, T. J., D. A. Holdbrook, and S. Khalid. 2011. Electroporation of the *E. coli* and *S. Aureus* membranes: molecular dynamics simulations of complex bacterial membranes. *J. Phys. Chem. B.* 115:13381–13388.
52. Kastowsky, M., T. Gutberlet, and H. Bradaczek. 1992. Molecular modelling of the three-dimensional structure and conformational flexibility of bacterial lipopolysaccharide. *J. Bacteriol.* 174:4798–4806.
53. Nikaido, H. 1985. Role of permeability barriers in resistance to  $\beta$ -lactam antibiotics. *Pharmacol. Ther.* 27:197–231.
54. Pezeshki, S., C. Chimerele, ..., U. Kleinekathöfer. 2009. Understanding ion conductance on a molecular level: an all-atom modeling of the bacterial porin OmpF. *Biophys. J.* 97:1898–1906.
55. Biró, I., S. Pezeshki, ..., U. Kleinekathöfer. 2010. Comparing the temperature-dependent conductance of the two structurally similar *E. coli* porins OmpC and OmpF. *Biophys. J.* 98:1830–1839.
56. Chimerele, C., L. Movileanu, ..., U. Kleinekathöfer. 2008. Transport at the nanoscale: temperature dependence of ion conductance. *Eur. Biophys. J.* 38:121–125.
57. Lee, K. I., S. Jo, ..., W. Im. 2012. Web interface for Brownian dynamics simulation of ion transport and its applications to  $\beta$ -barrel pores. *J. Comput. Chem.* 33:331–339.

**Biophysical Journal, Volume 110**

**Supplemental Information**

**Dynamics and Interactions of OmpF and LPS: Influence on Pore Accessibility and Ion Permeability**

**Dhilon S. Patel, Suyong Re, Emilia L. Wu, Yifei Qi, Phillip E. Klebba, Göran Widmalm, Min Sun Yeom, Yuji Sugita, and Wonpil Im**



# Biophysical Journal

## Supporting Material

### Dynamics and Interactions of OmpF and LPS: Influence on Pore Accessibility and Ion Permeability

Dhilon S. Patel,<sup>1</sup> Suyong Re,<sup>2,3,4</sup> Emilia L. Wu,<sup>1</sup> Yifei Qi,<sup>1</sup> Phillip E. Klebba,<sup>5</sup> Göran Widmalm,<sup>6</sup> Min Sun Yeom,<sup>7</sup> Yuji Sugita,<sup>2,3,4</sup> and Wonpil Im<sup>1,\*</sup>

<sup>1</sup>Department of Molecular Biosciences and Center for Computational Biology, The University of Kansas, Lawrence, Kansas; <sup>2</sup>RIKEN Theoretical Molecular Science Laboratory, Hirosawa, Wako, Saitama, Japan; <sup>3</sup>RIKEN Quantitative Biology Center (QBiC), IMDA 6F, and <sup>4</sup>RIKEN Advanced Institute for Computational Science, Chuo-ku, Kobe, Hyogo Prefecture, Japan; <sup>5</sup>Department of Biochemistry and Molecular Biophysics, Kansas State University, Manhattan, Kansas; <sup>6</sup>Department of Organic Chemistry and Stockholm Center for Biomembrane Research, Arrhenius Laboratory, Stockholm University, Stockholm, Sweden; and <sup>7</sup>Korean Institute of Science and Technology Information, Yuseong-gu, Daejeon, Korea

\*Correspondence: [wonpil@ku.edu](mailto:wonpil@ku.edu)

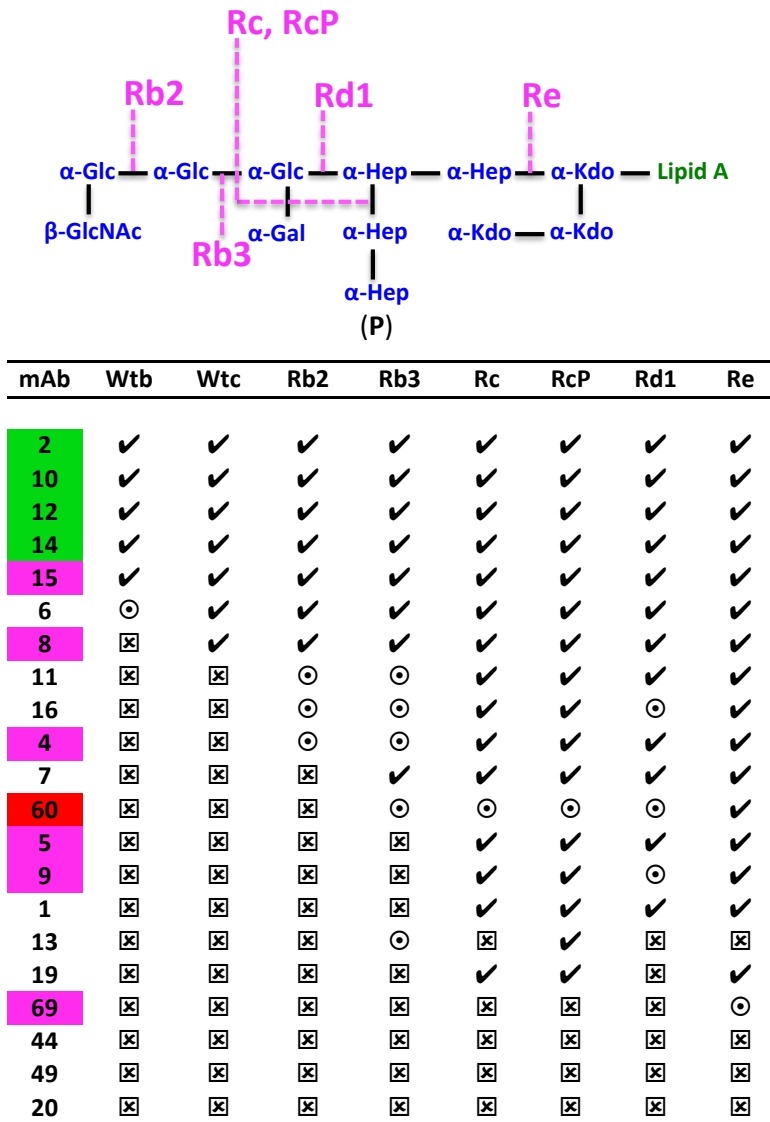

**FIGURE S1.** LPS core structure of *E. coli* K12 with chemotypes (Ra to Re). Experimental data for accessibility of mAbs with truncation of *E. coli* K12 core. ⊗ represents no activity for mAb, ⊙ represents low activity for mAb, and ✓ represents high activity for mAb. mAbs are grouped to S1 (green) binding to loop L4, S2 (magenta) binding to loop L5, and S3c (red) binding to loop L1. Abbreviations: GlcNAc, *N*-acetyl-D-glucosamine; Glc, D-glucose; Gal, D-galactose; Hep, *L*-glycero-D-manno-heptose; P, phosphate, Kdo, 2-keto-3-deoxyoctulosonic acid. (see Ref. 14, 15 for more details).

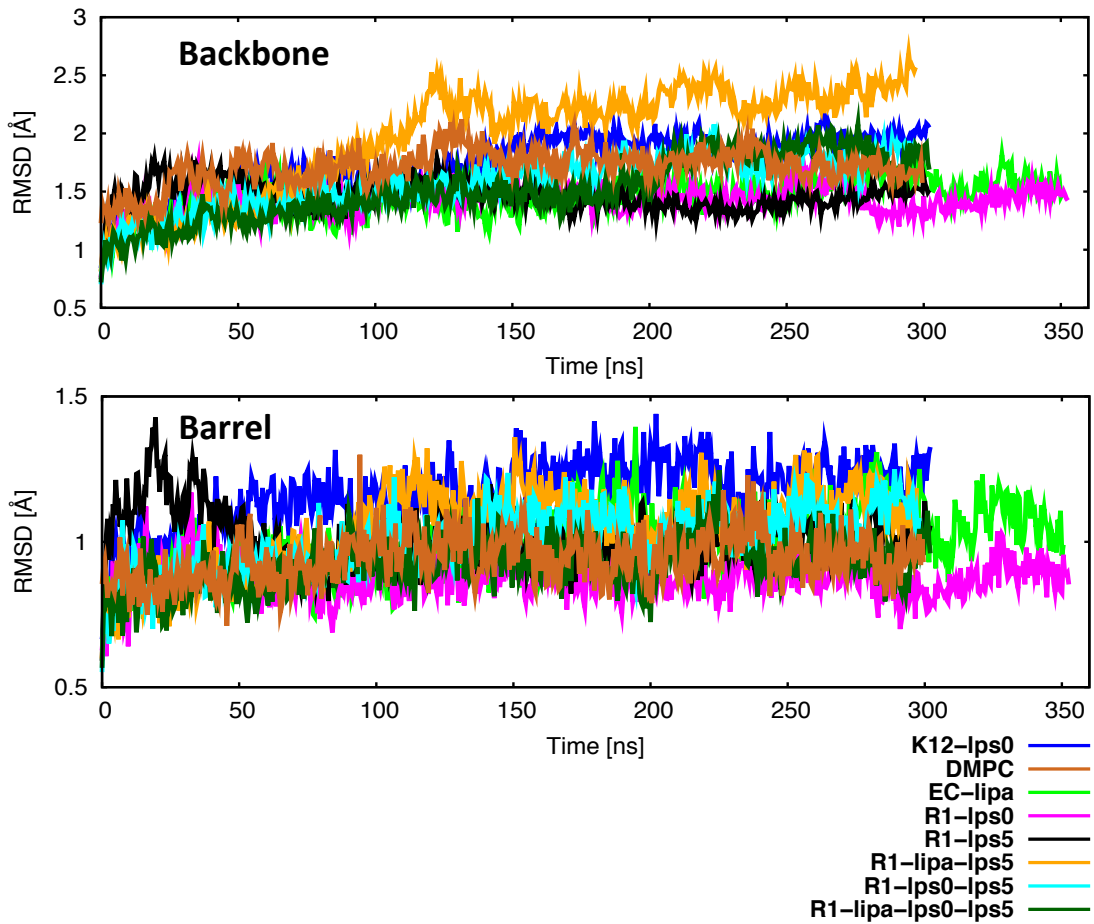

**FIGURE S2.** RMSD time-series of backbone and barrel atoms.



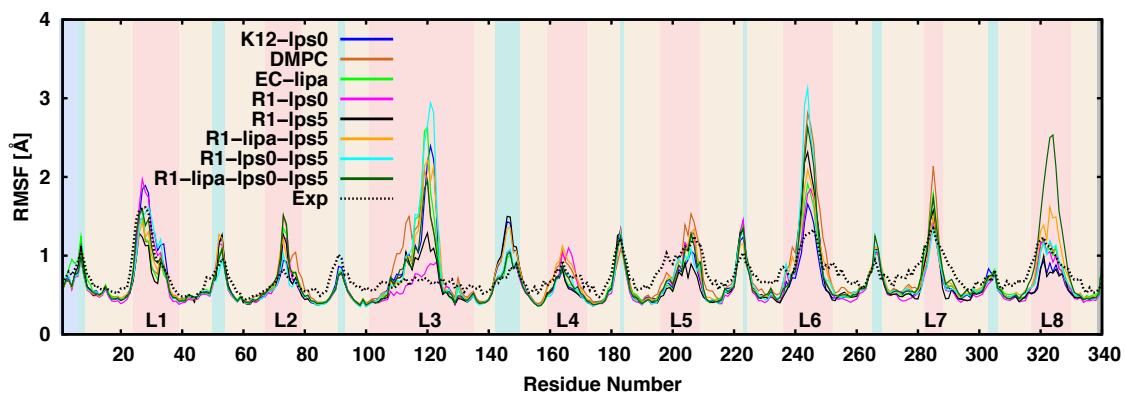

**FIGURE S3.** Root mean-square fluctuations (RMSFs) of the OmpF backbone atoms compared with experimental (Exp). Protein secondary structure is indicated by the background color:  $\beta$ -barrel (beige), loop (coral), turn (turquoise), N terminus (light blue), and C terminus (gray).

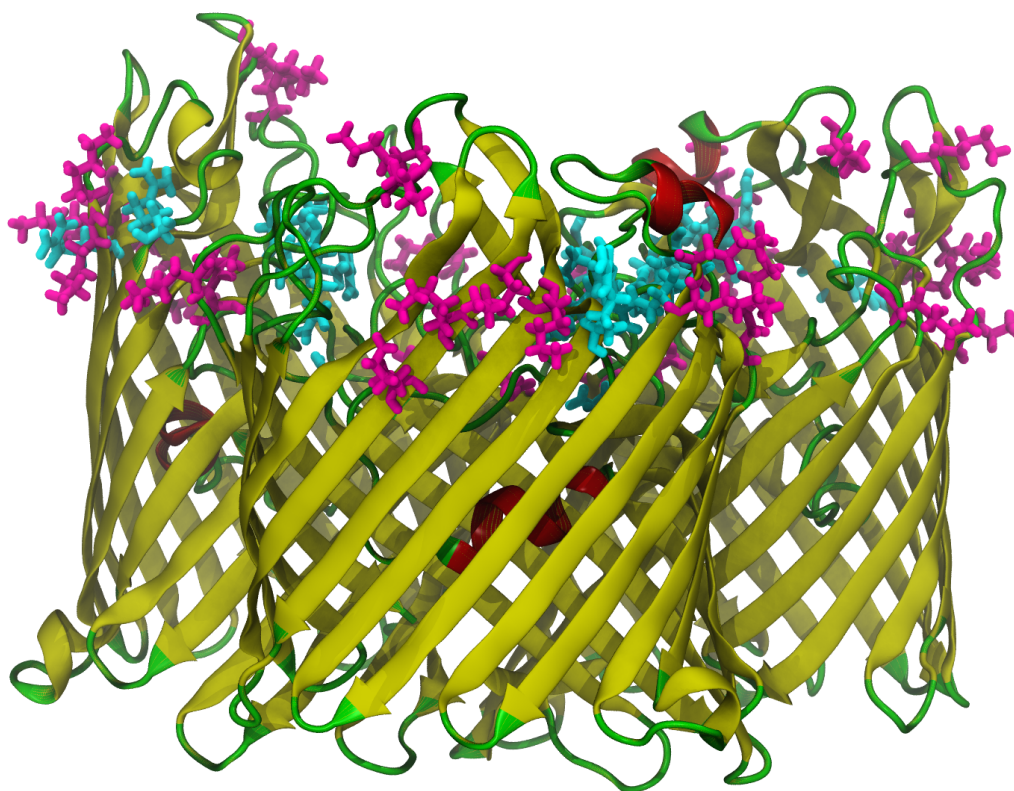

**FIGURE S4.** Lys (magenta) and Arg (cyan) residues ( $z > 10$ ) that are prominently located on the outer surface.

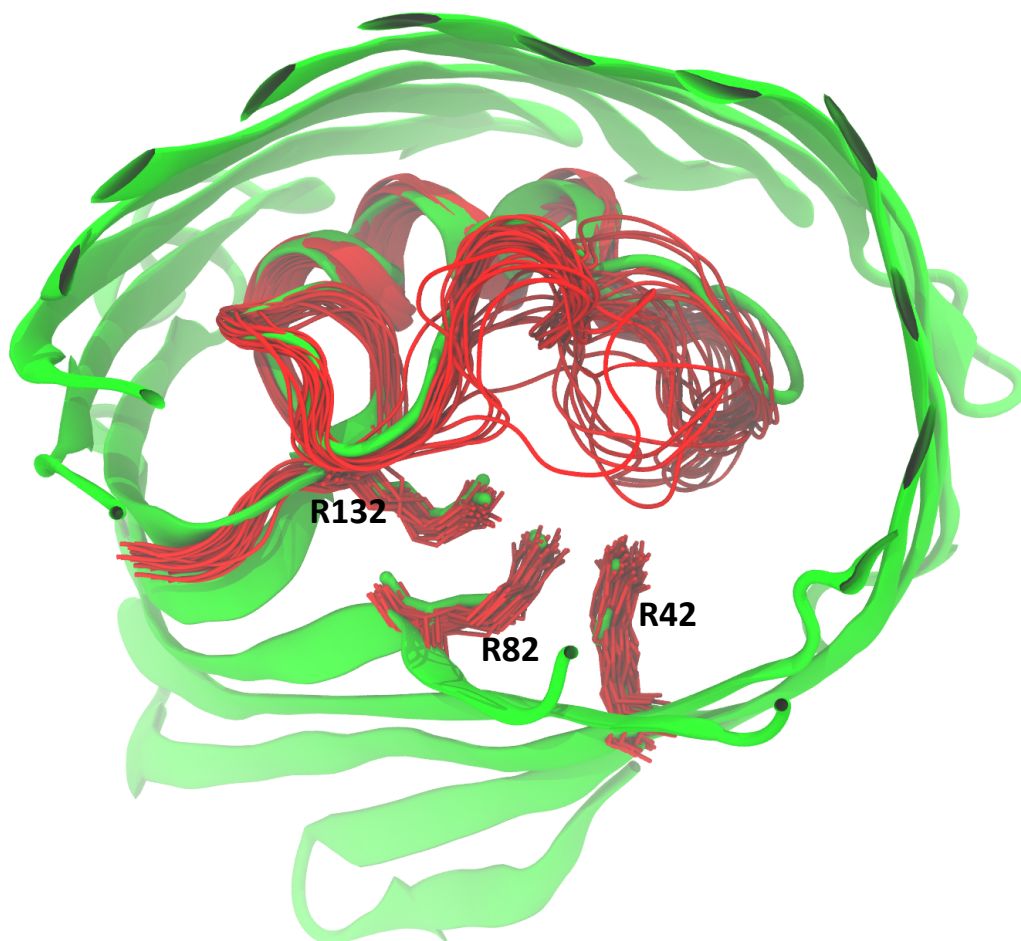

**FIGURE S5.** Fluctuations (Red) of the loop L3 and three cationic residues R42, R82, and R132 in one of the monomers superimposed with X-ray structure (Green).

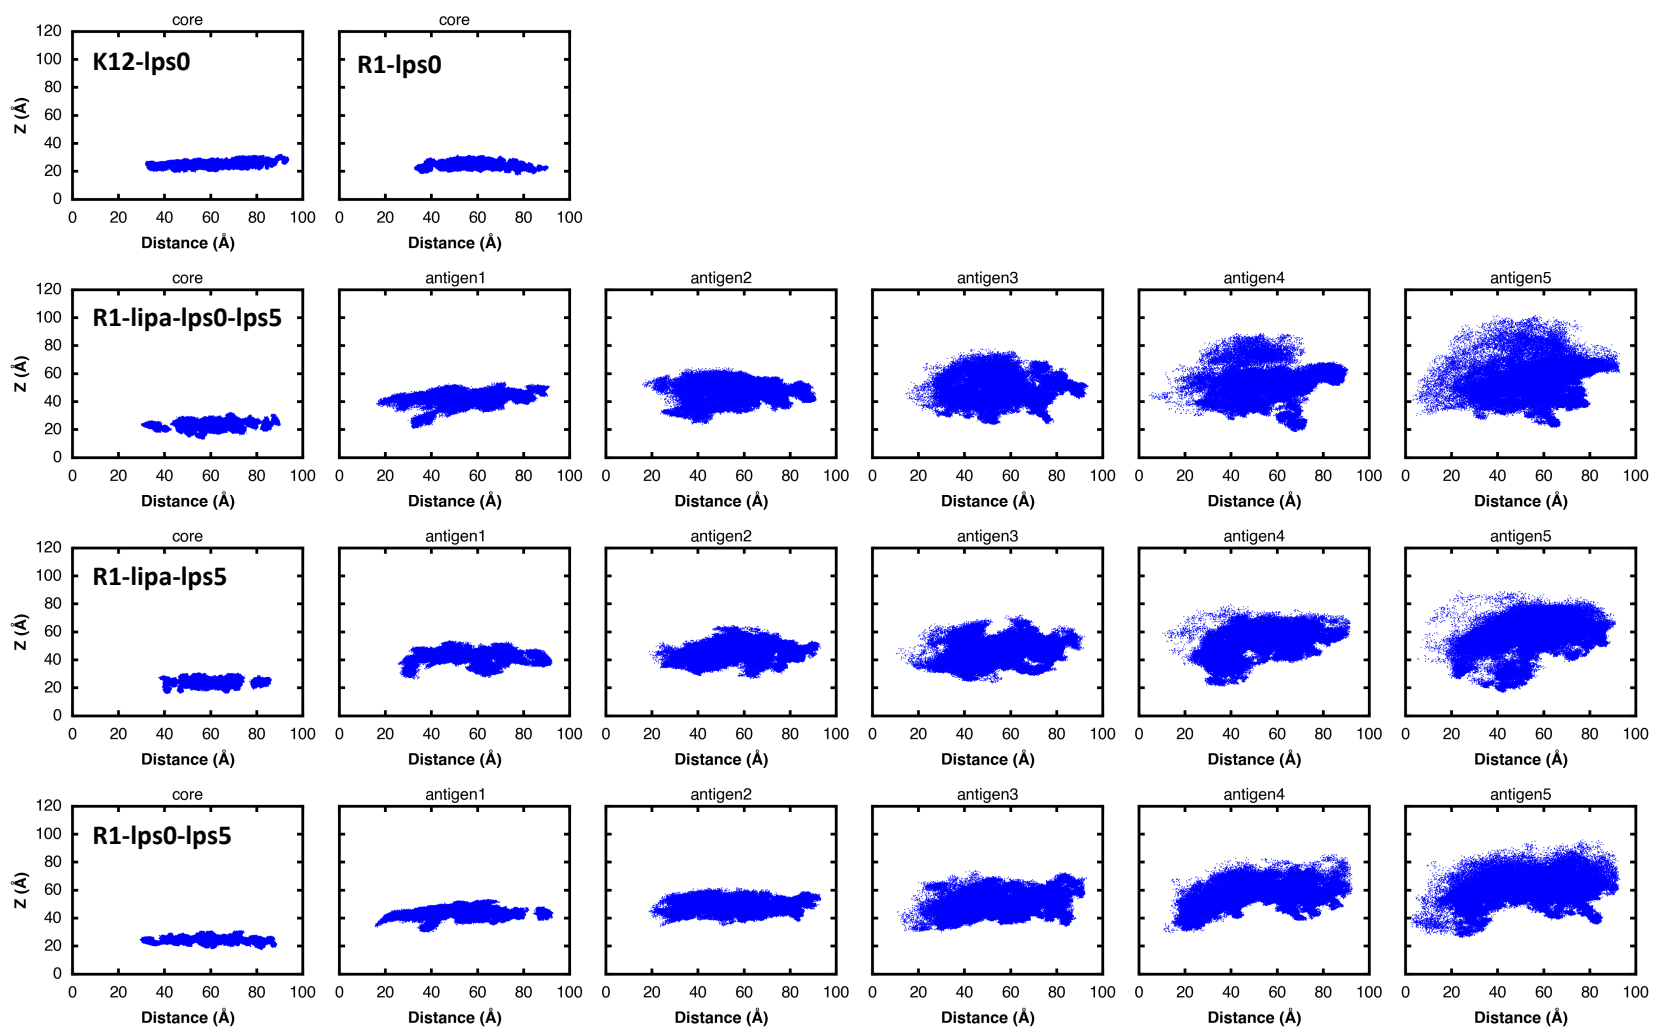

**FIGURE S6.** Flexibility of the core and O-antigens. 2D-scatter plots of the center of mass of core and O-antigen repeating units along the Z-axis and the distance from the center of mass of OmpF trimer for all systems. The bilayer is re-centered to  $z = 0$ .

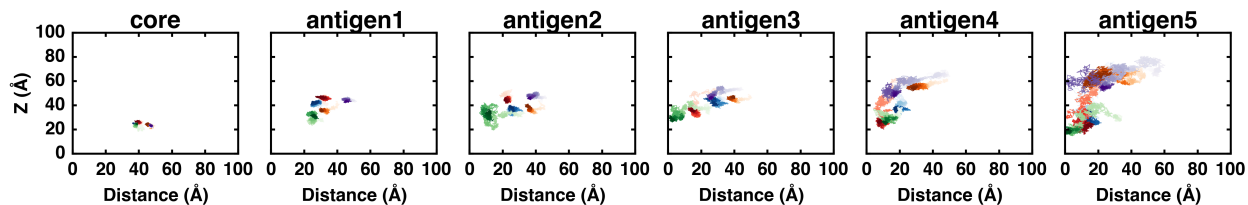

**FIGURE S7.** Representative examples of O-antigen flexibility during the simulation time. The positions of core and O-antigens of five selected LPS molecules are shown with lightest to darkest shade depicting transition from initial position to final position at end of simulation. Each color scheme in all figures represents positions of individual LPS molecule.



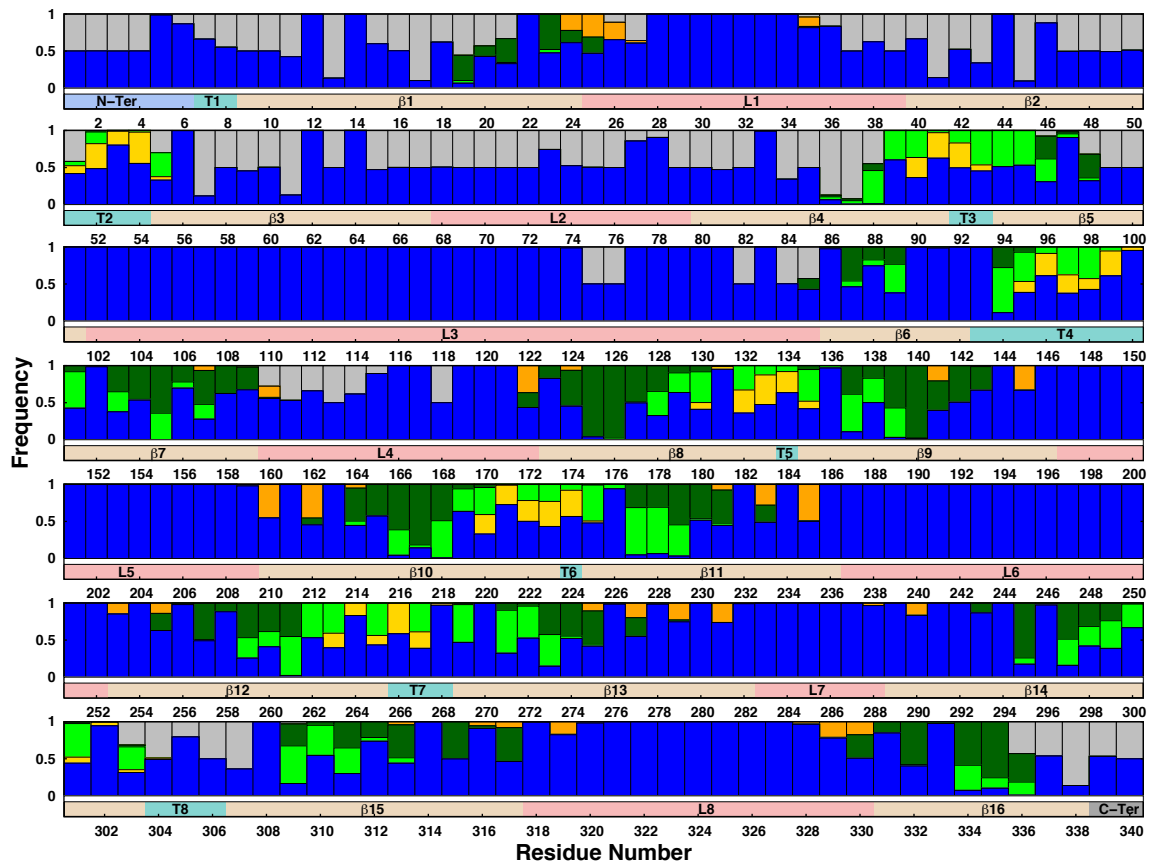

**FIGURE S8A.** Interaction patterns of OmpF residues with their surrounding environments in EC-lipa. For color coding please check main text Fig. 5.

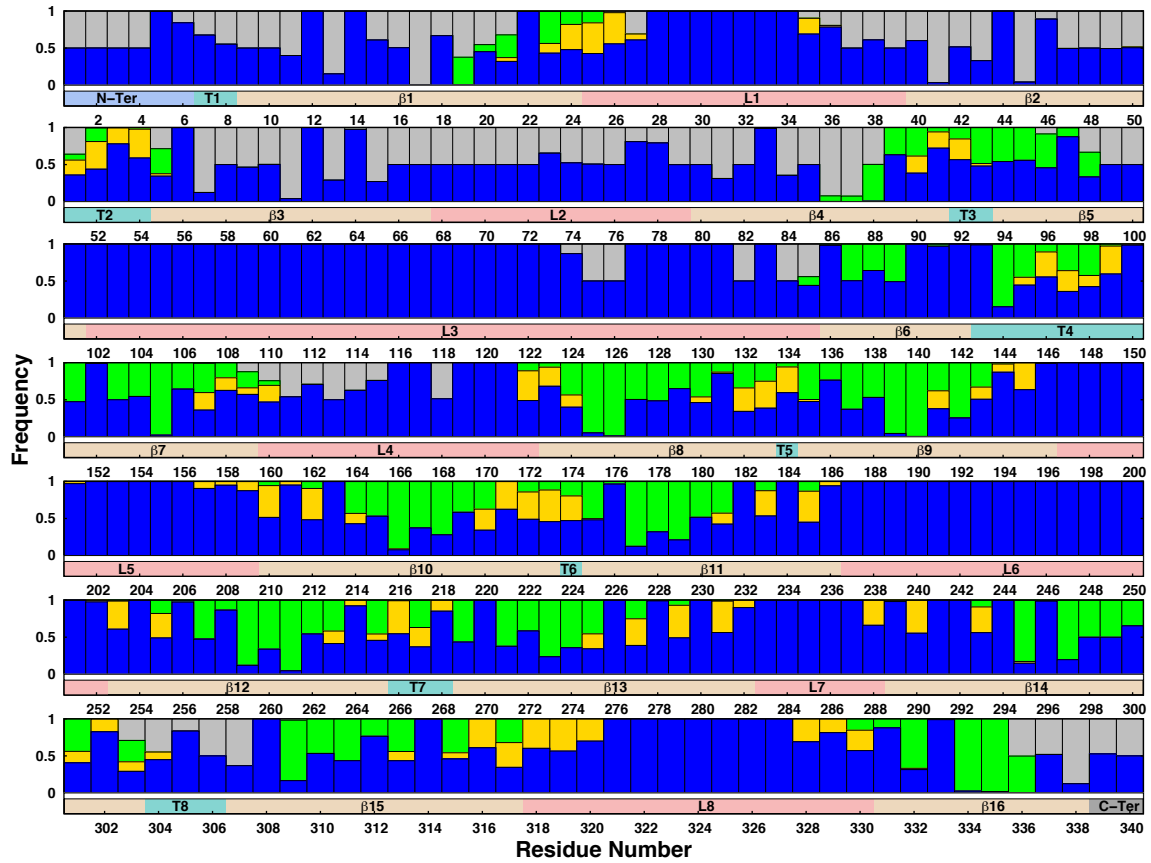

**FIGURE S8B.** Interaction patterns of OmpF residues with their surrounding environments in DMPC. For color coding please check main text Fig. 5.

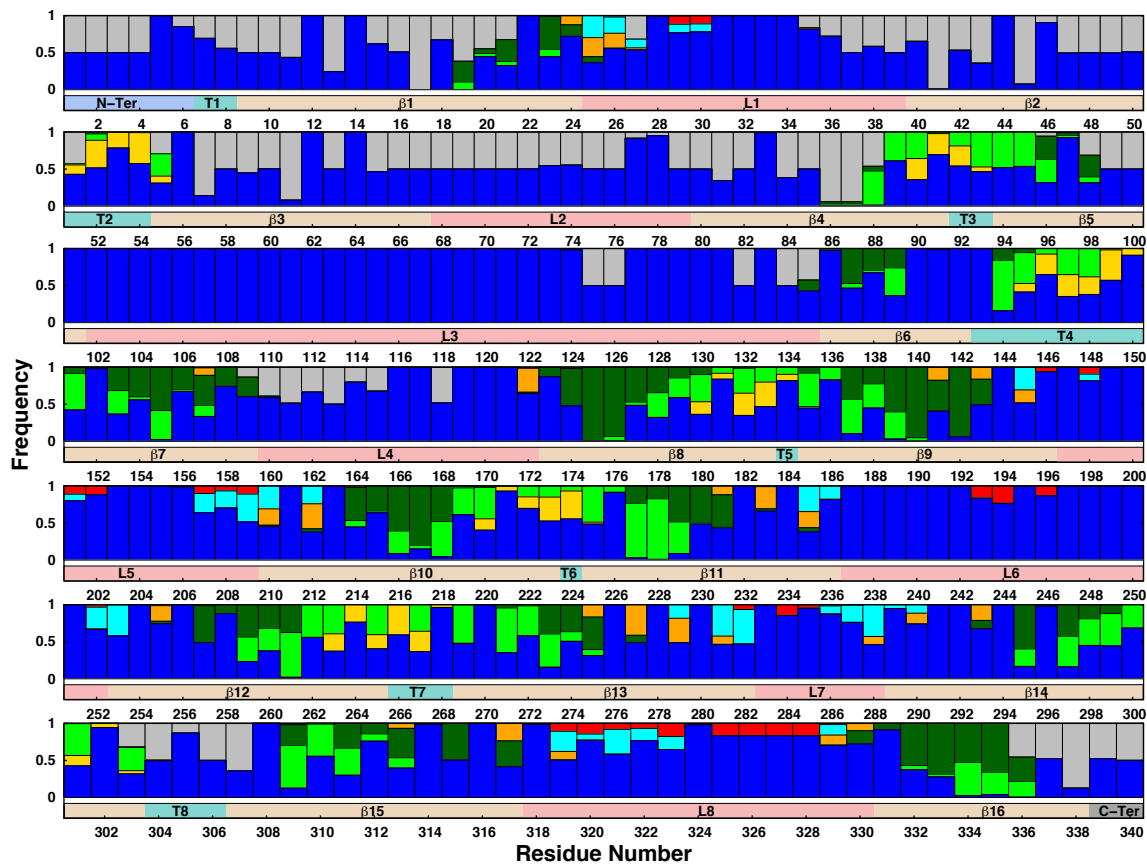

**FIGURE S8C.** Interaction patterns of OmpF residues with their surrounding environments in R1-lps0. For color coding please check main text Fig. 5.

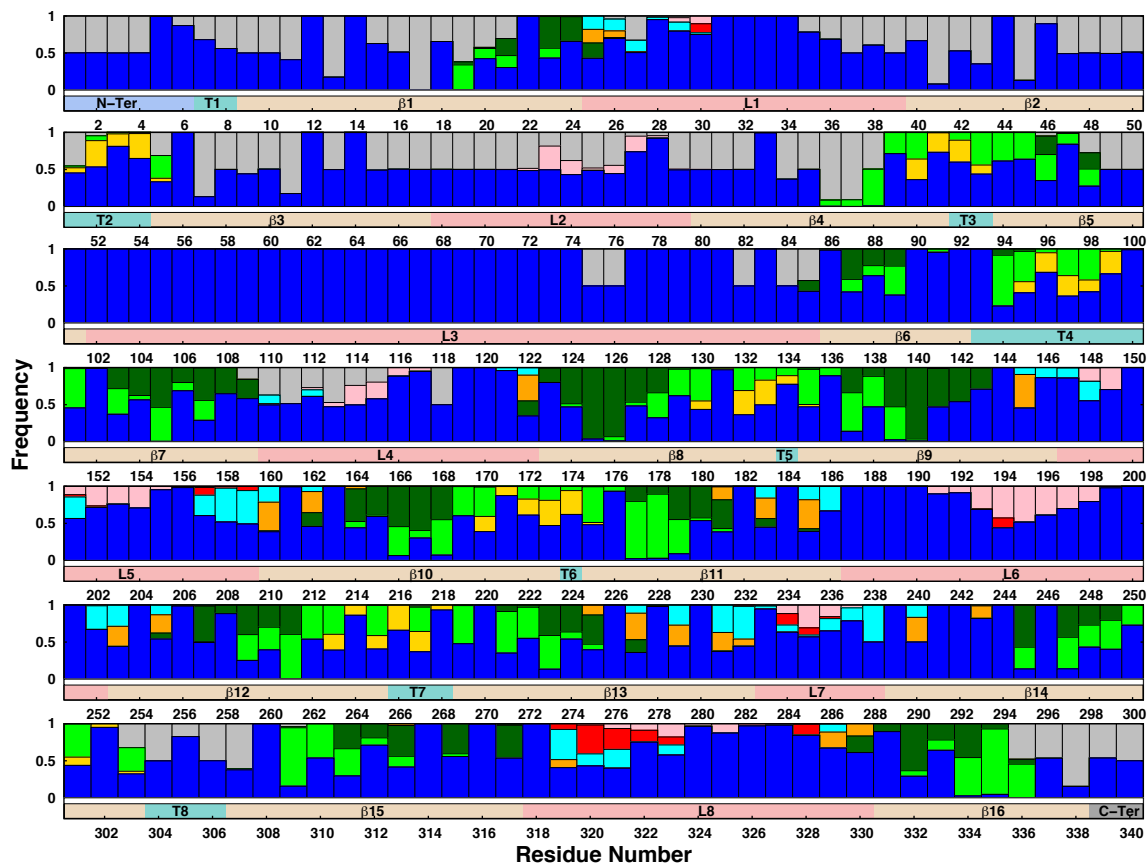

**FIGURE S8D.** Interaction patterns of OmpF residues with their surrounding environments in R1-lps5. For color coding please check main text Fig. 5. In addition the graph shows, for each residue, the frequency of occurrence within 5 Å of an O-antigen (pink).

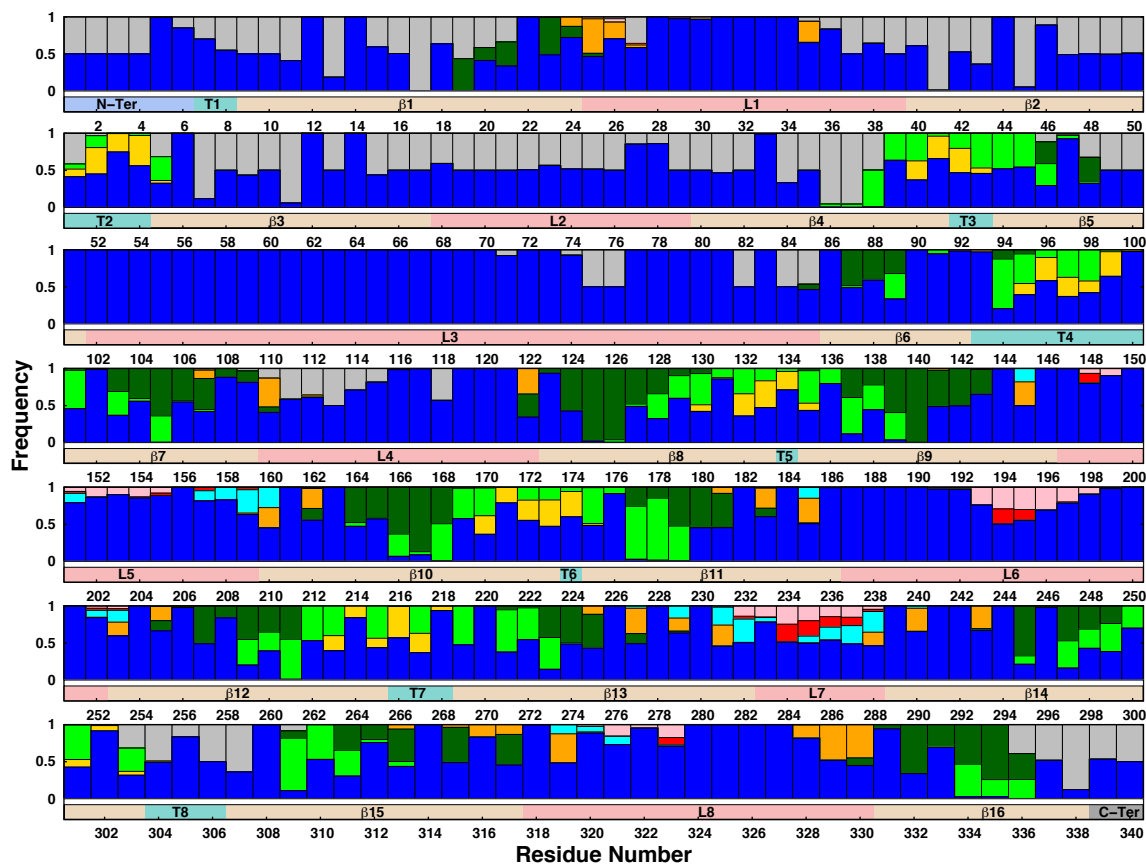

**FIGURE S8E.** Interaction patterns of OmpF residues with their surrounding environments in R1-lipa-lps5. For color coding please check main text Fig. 5. In addition the graph shows, for each residue, the frequency of occurrence within 5 Å of an O-antigen (pink).



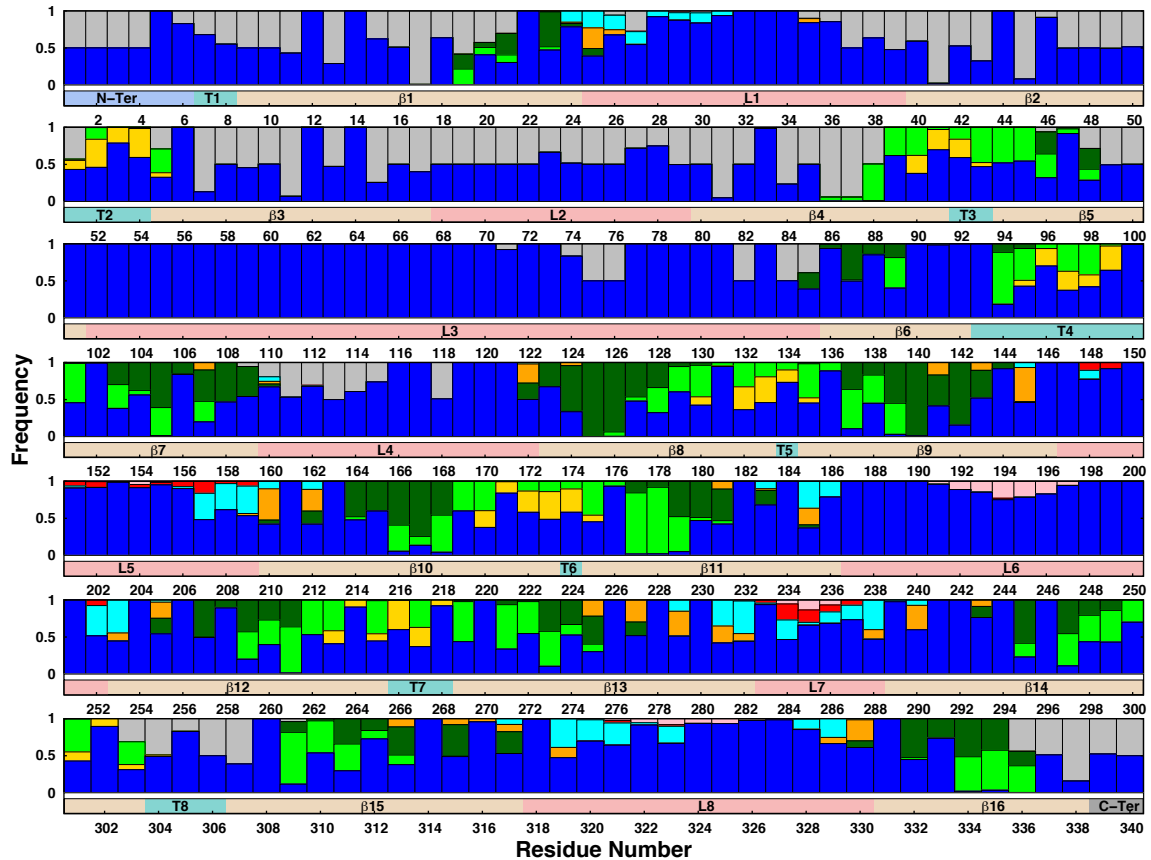

**FIGURE S8F.** Interaction patterns of OmpF residues with their surrounding environments in R1-lps0-lps5. For color coding please check main text Fig. 5. In addition the graph shows, for each residue, the frequency of occurrence within 5 Å of an O-antigen (pink).

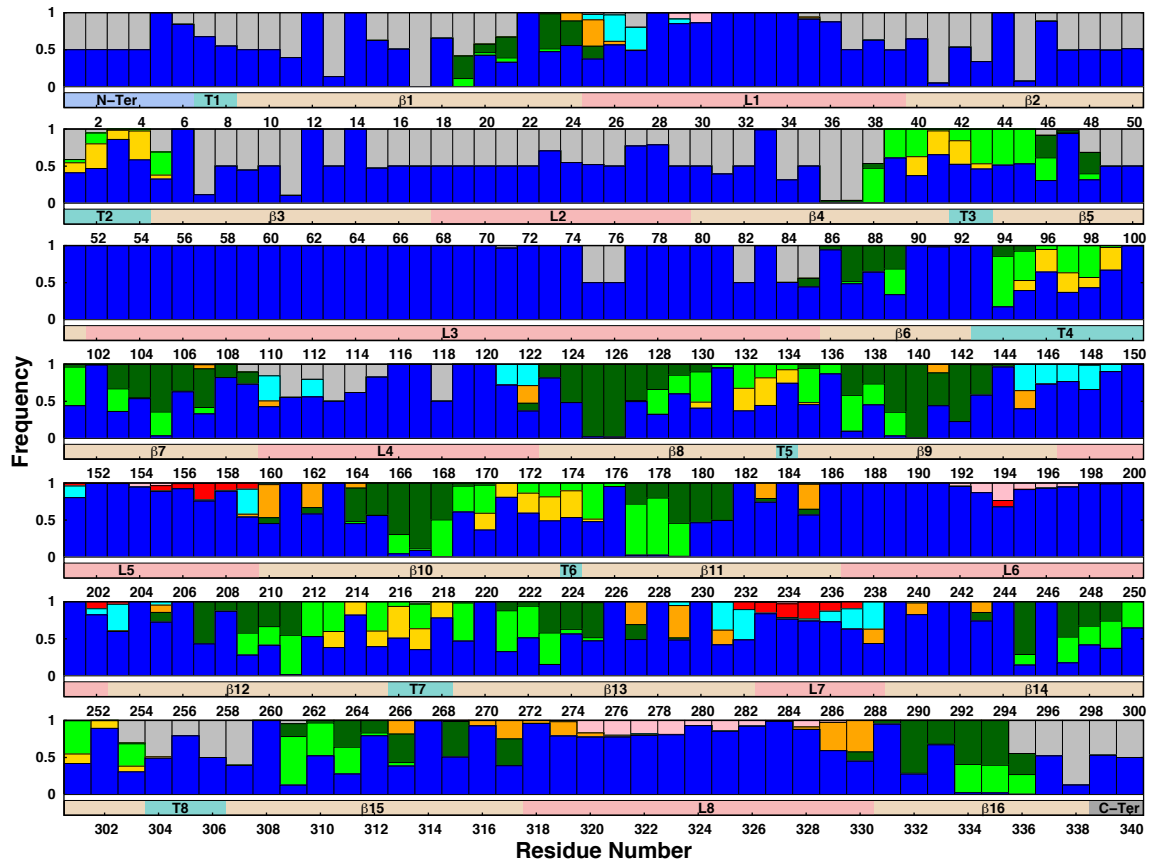

**FIGURE S8G.** Interaction patterns of OmpF residues with their surrounding environments in R1-lipa-lps0-lps5. For color coding please check main text Fig. 5. In addition the graph shows, for each residue, the frequency of occurrence within 5 Å of an O-antigen (pink).

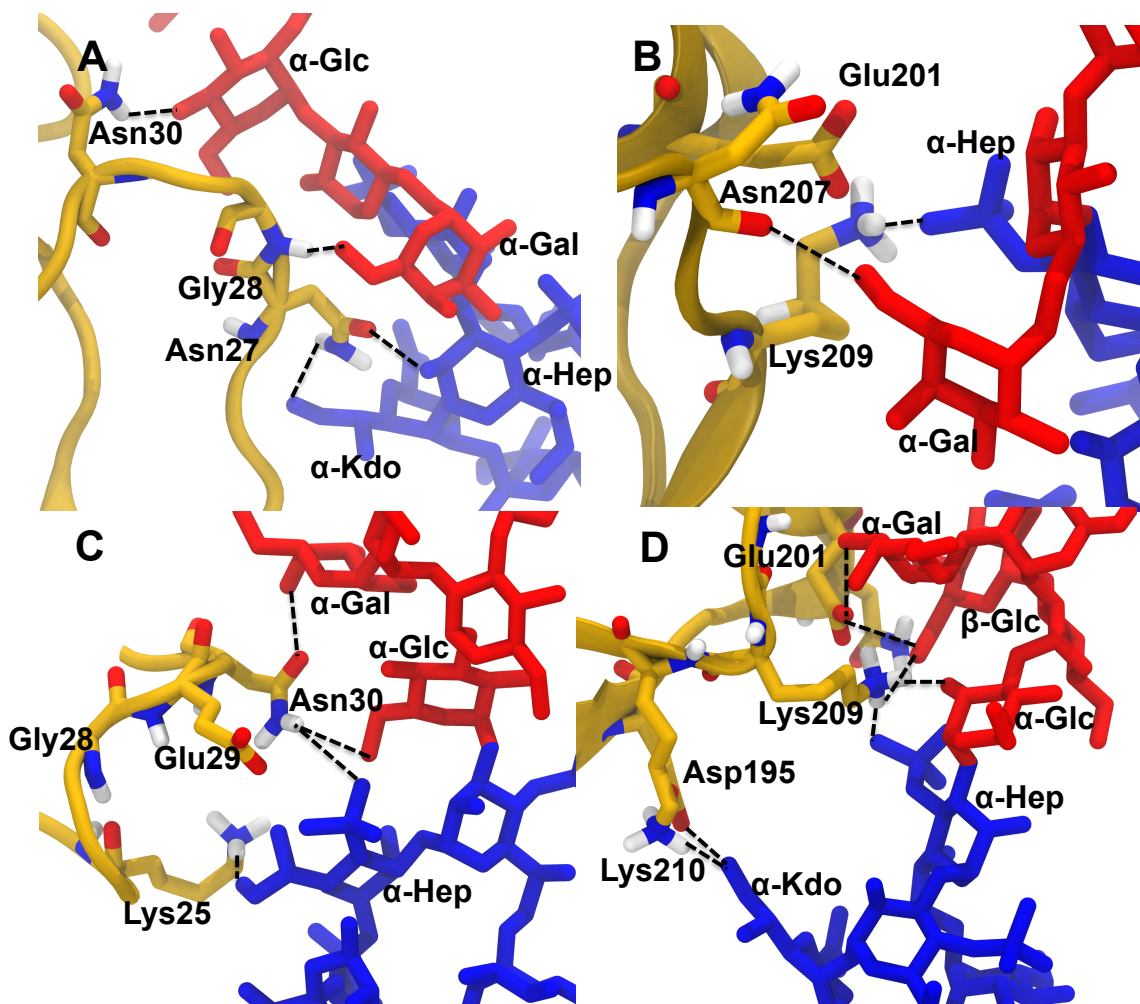

**FIGURE S9.** Snapshots of interactions of L1 (epitope site S3c) and L5 (epitope site S2) loop residues with LPS in K12-lps0 (A and B) and in R1-lps0 (C and D) systems. Protein residues are colored yellow, whereas LPS inner core and outer core sugars are colored blue and red respectively. Exocyclic hydroxylmethyl ( $\text{CH}_2\text{OH}$ ) group of  $\alpha$ -Gal (outer core sugar) of K12 core makes H-bonding with backbone NH of Gly28 and  $\text{C}=\text{O}$  of Asn207 in loop L1 and L5, respectively (A and B). In addition, K12-lps0 system showed H-bonding and electrostatic interactions between  $\alpha$ -Hep (inner core sugars) and protein residues (especially Asn27 in L1 and Lys209/Glu201 in L5). Variable  $\alpha$ -Hep of inner core and terminal  $\alpha$ -Gal and  $\alpha$ -Glc/ $\beta$ -Glc of outer core sugars in R1-lps0 system are interacting with loop L1 and L5 residues (C and D).

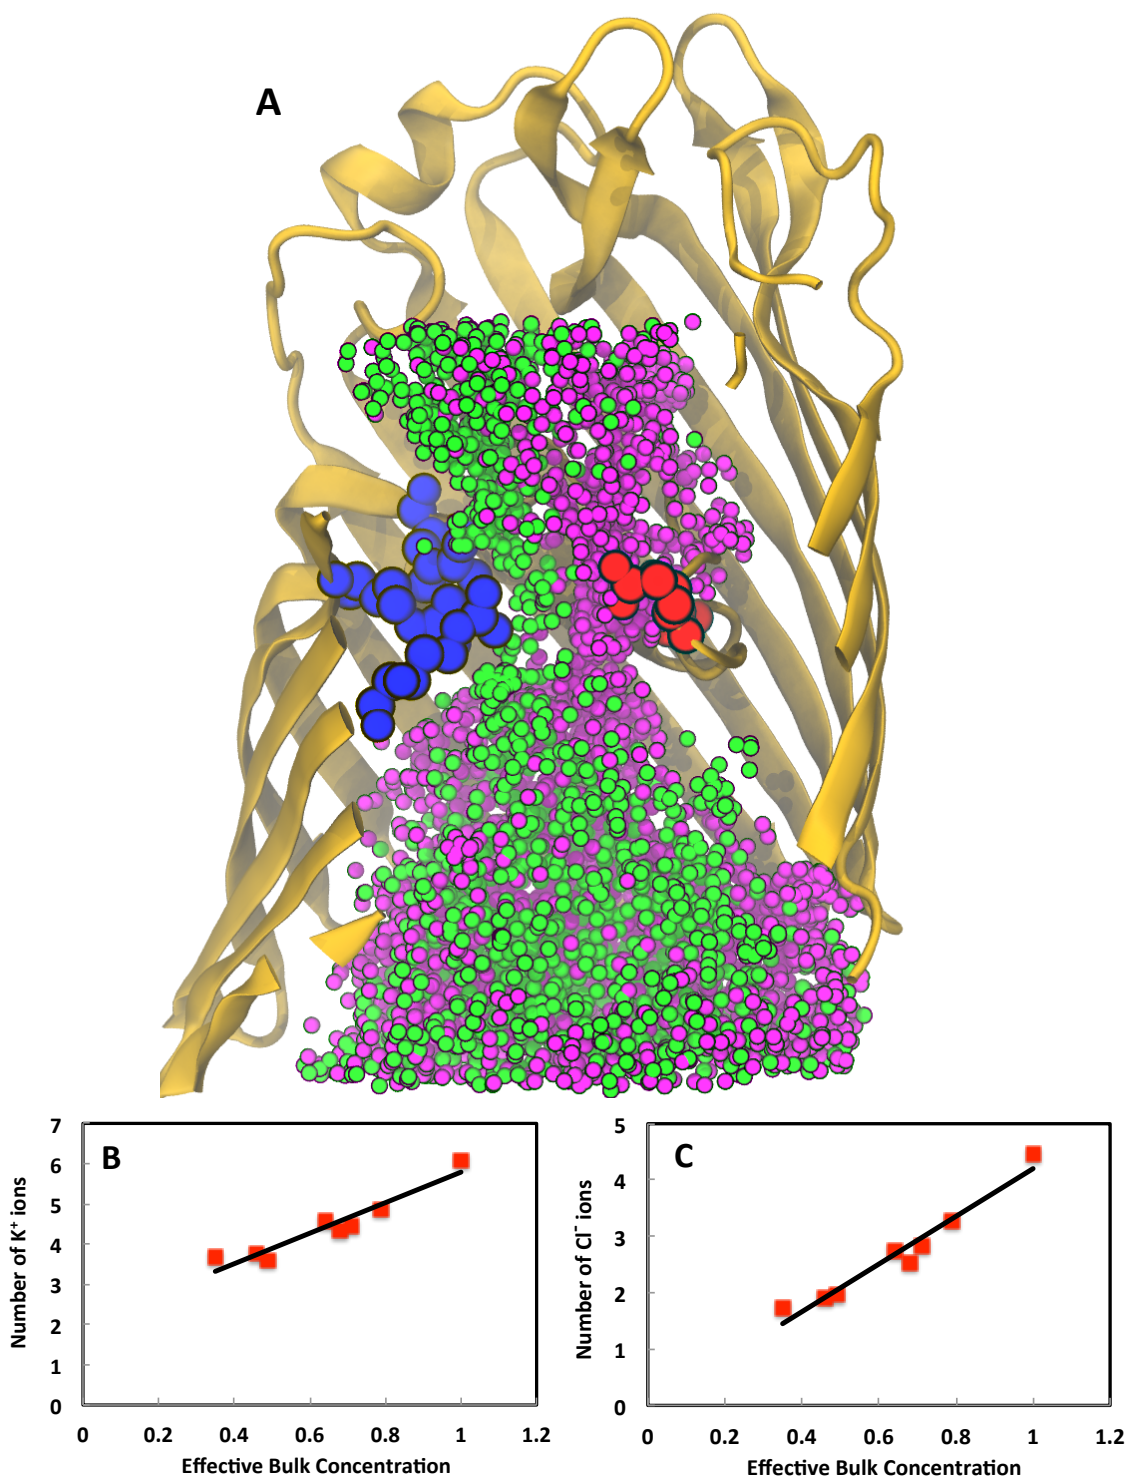

**FIGURE S10.** Number of  $K^+$  and  $Cl^-$  as a function of effective KCl bulk concentration. (A) Superposition of ion positions extracted every 2 ns along a 300-ns MD trajectory from all three monomers in K12-lps0 system (magenta for  $K^+$  and green for  $Cl^-$ ) and with constriction zone defined by positively charged residues Arg42, Arg82, and Arg132 (blue) and negatively charged residues Asp113 and Glu117 (red). Number of (B)  $K^+$  and (C)  $Cl^-$  as a function of effective KCl bulk concentration.

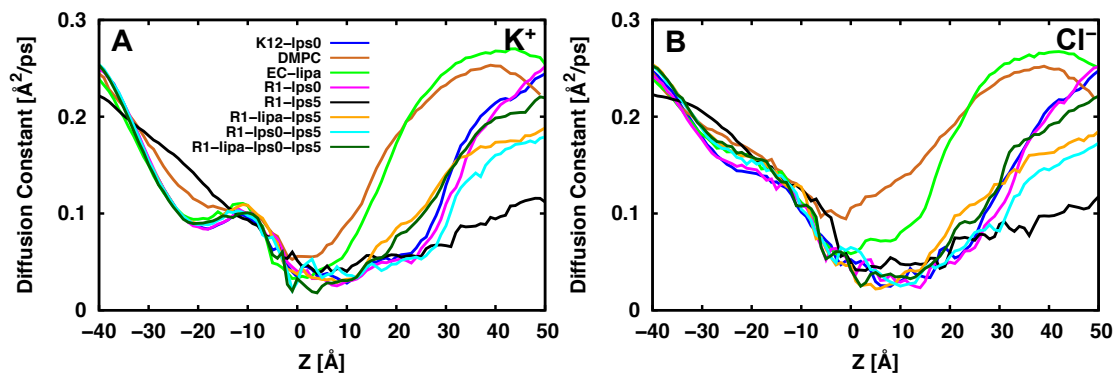

**FIGURE S11.** The diffusion constant profiles of (A) K<sup>+</sup> and (B) Cl<sup>-</sup> ions along the channel axis. The OmpF's center of mass in each system is re-centered to  $z = 0$ . PLs reside on the side of  $z < 0$  and LPS on the side of  $z > 0$ .



**Table S1.** Details of size and composition of all systems.

| Segment\System                                      | K12-lps0                      | EC-lipa                       | R1-lps0                       | R1-lps5                       | R1-lipa-lps5                  | R1-lps0-lps5                  | R1-lipa-lps0-lps5             | DMPC                    |
|-----------------------------------------------------|-------------------------------|-------------------------------|-------------------------------|-------------------------------|-------------------------------|-------------------------------|-------------------------------|-------------------------|
| <b>Protein</b>                                      | 340 x 3<br>(PROA/B/C)         | 340 x 3<br>(PROA/B/C)   |
| <b>Membrane</b>                                     | 200 (PPPE,<br>PVPG,<br>PVCL2) | 312 (DMPC)              |
| <b>Lipa</b>                                         | -                             | 77                            | -                             | -                             | 38                            | -                             | 25                            | -                       |
| <b>Lps0</b>                                         | 73                            | -                             | 73                            | -                             | -                             | 36                            | 24                            | -                       |
| <b>Lps5</b>                                         | -                             | -                             | -                             | 69                            | 37                            | 35                            | 24                            | -                       |
| <b>P-bound Water</b>                                | 618                           | 618                           | 618                           | 618                           | 618                           | 618                           | 618                           | -                       |
| <b>Water</b>                                        | 34,414                        | 33,128                        | 31,249                        | 43,129                        | 50,563                        | 47,385                        | 51,611                        | 23,382                  |
| <b>Ca<sup>2+</sup>/K<sup>+</sup>/Cl<sup>-</sup></b> | 365/470/380                   | 154/470/379                   | 365/470/380                   | 345/703/613                   | 261/474/384                   | 355/470/380                   | 290/470/380                   | 342/312                 |
| <b>No. Atoms</b>                                    | 188,178                       | 165,658                       | 176,420                       | 250,731                       | 247,937                       | 244,223                       | 245,521                       | 122,835                 |
| <b>Box size(Å<sup>3</sup>)</b>                      | 132.8 x 132.8<br>x 116.6      | 132.7 x 132.7<br>x 102.2      | 132.8 x 132.8<br>x 109.7      | 132.7 x 132.7<br>x 173.1      | 133.4 x 133.4<br>x 150.6      | 132.7 x 132.7<br>x 150.8      | 132.7 x 132.7<br>x 150.7      | 119.1 x 119.1<br>x 88.2 |
| <b>Simulation Length in ns</b>                      | 300                           | 350                           | 350                           | 300                           | 300                           | 300                           | 300                           | 300                     |

**Table S2.** The RMSDs of main structural elements: backbone (BB), side chain (SC), barrel, loop, and turn of three monomers of OmpF in all systems. The standard errors for three monomers are also given.

| System                   | Monomer | All atoms   | BB          | SC          | Barrel      | Loop        | Turn        |
|--------------------------|---------|-------------|-------------|-------------|-------------|-------------|-------------|
| <b>DMPC</b>              | ProA    | 2.29        | 1.95        | 2.61        | 1.01        | 2.84        | 1.35        |
|                          | ProB    | 2.08        | 1.67        | 2.44        | 0.90        | 2.40        | 1.27        |
|                          | ProC    | 1.93        | 1.46        | 2.33        | 0.90        | 1.98        | 1.37        |
| <i>Std. err.</i>         |         | <i>0.09</i> | <i>0.12</i> | <i>0.07</i> | <i>0.03</i> | <i>0.20</i> | <i>0.03</i> |
| <b>EC-lipa</b>           | ProA    | 2.02        | 1.58        | 2.40        | 1.08        | 2.06        | 1.58        |
|                          | ProB    | 1.83        | 1.46        | 2.16        | 0.93        | 1.95        | 1.46        |
|                          | ProC    | 1.66        | 1.28        | 2.00        | 0.95        | 1.60        | 1.34        |
| <i>Std. err.</i>         |         | <i>0.08</i> | <i>0.07</i> | <i>0.10</i> | <i>0.04</i> | <i>0.11</i> | <i>0.06</i> |
| <b>K12-lps0</b>          | ProA    | 2.06        | 1.69        | 2.40        | 1.30        | 2.11        | 1.69        |
|                          | ProB    | 2.38        | 2.01        | 2.73        | 1.09        | 2.86        | 1.67        |
|                          | ProC    | 1.83        | 1.43        | 2.17        | 1.08        | 1.78        | 1.52        |
| <i>Std. err.</i>         |         | <i>0.13</i> | <i>0.14</i> | <i>0.14</i> | <i>0.06</i> | <i>0.26</i> | <i>0.04</i> |
| <b>R1-lps0</b>           | ProA    | 2.18        | 1.80        | 2.52        | 0.94        | 2.60        | 1.40        |
|                          | ProB    | 1.72        | 1.24        | 2.12        | 0.79        | 1.65        | 1.25        |
|                          | ProC    | 1.55        | 1.13        | 1.91        | 0.89        | 1.32        | 1.41        |
| <i>Std. err.</i>         |         | <i>0.15</i> | <i>0.17</i> | <i>0.15</i> | <i>0.04</i> | <i>0.31</i> | <i>0.04</i> |
| <b>R1-lps5</b>           | ProA    | 2.15        | 1.77        | 2.50        | 1.11        | 2.41        | 1.63        |
|                          | ProB    | 1.80        | 1.40        | 2.15        | 1.02        | 1.73        | 1.60        |
|                          | ProC    | 1.66        | 1.17        | 2.05        | 0.90        | 1.38        | 1.47        |
| <i>Std. err.</i>         |         | <i>0.12</i> | <i>0.14</i> | <i>0.11</i> | <i>0.05</i> | <i>0.24</i> | <i>0.04</i> |
| <b>R1-lipa-lps5</b>      | ProA    | 2.69        | 2.36        | 3.00        | 1.20        | 3.44        | 1.67        |
|                          | ProB    | 1.92        | 1.55        | 2.26        | 0.88        | 2.17        | 1.30        |
|                          | ProC    | 2.28        | 1.92        | 2.61        | 1.01        | 2.74        | 1.59        |
| <i>Std. err.</i>         |         | <i>0.18</i> | <i>0.19</i> | <i>0.18</i> | <i>0.08</i> | <i>0.30</i> | <i>0.09</i> |
| <b>R1-lps0-lps5</b>      | ProA    | 1.94        | 1.48        | 2.32        | 0.83        | 2.09        | 1.23        |
|                          | ProB    | 1.88        | 1.51        | 2.21        | 1.03        | 1.95        | 1.61        |
|                          | ProC    | 2.05        | 1.70        | 2.37        | 1.12        | 2.29        | 1.55        |
| <i>Std. err.</i>         |         | <i>0.04</i> | <i>0.06</i> | <i>0.04</i> | <i>0.07</i> | <i>0.08</i> | <i>0.09</i> |
| <b>R1-lipa-lps0-lps5</b> | ProA    | 1.73        | 1.30        | 2.10        | 0.88        | 1.66        | 1.45        |
|                          | ProB    | 1.66        | 1.25        | 2.01        | 0.94        | 1.55        | 1.34        |
|                          | ProC    | 2.35        | 1.92        | 2.74        | 0.93        | 2.81        | 1.30        |
| <i>Std. err.</i>         |         | <i>0.18</i> | <i>0.18</i> | <i>0.19</i> | <i>0.02</i> | <i>0.33</i> | <i>0.04</i> |

**Table S3.** Numbers of  $K^+$  and  $Cl^-$  for all the systems in each pore along with the occupancy ratio of ions ( $N_K/N_{Cl}$ ). The standard errors for all three pores are presented in parentheses.

| System                   | $K^+$ |      |      | Avg. $K^+$<br>( $N_K$ ) | $Cl^-$ |      |      | Avg. $Cl^-$<br>( $N_{Cl}$ ) | Avg.<br>$N_K/N_{Cl}$ |
|--------------------------|-------|------|------|-------------------------|--------|------|------|-----------------------------|----------------------|
|                          | ProA  | ProB | ProC |                         | ProA   | ProB | ProC |                             |                      |
| <b>DMPC</b>              | 4.7   | 5.1  | 4.8  | 4.9 (0.08)              | 3.1    | 3.3  | 3.4  | 3.3 (0.08)                  | 1.49                 |
| <b>EC-lipa</b>           | 4.2   | 4.7  | 4.8  | 4.6 (0.15)              | 2.5    | 3.0  | 2.7  | 2.7 (0.12)                  | 1.70                 |
| <b>K12-lps0</b>          | 4.6   | 4.0  | 4.4  | 4.3 (0.14)              | 2.9    | 1.9  | 2.8  | 2.5 (0.27)                  | 1.72                 |
| <b>R1-lps0</b>           | 4.4   | 4.9  | 4.1  | 4.5 (0.20)              | 3.0    | 2.9  | 2.6  | 2.8 (0.10)                  | 1.61                 |
| <b>R1-lps5</b>           | 6.0   | 6.5  | 5.8  | 6.1 (0.18)              | 4.5    | 4.6  | 4.3  | 4.5 (0.07)                  | 1.36                 |
| <b>R1-lipa-lps5</b>      | 3.3   | 4.0  | 4.0  | 3.8 (0.19)              | 1.6    | 2.4  | 1.7  | 1.9 (0.22)                  | 2.00                 |
| <b>R1-lps0-lps5</b>      | 3.6   | 3.8  | 3.4  | 3.6 (0.09)              | 1.8    | 1.9  | 2.2  | 2.0 (0.12)                  | 1.80                 |
| <b>R1-lips-lps0-lps5</b> | 4.0   | 3.6  | 3.4  | 3.7 (0.16)              | 2.1    | 1.9  | 1.2  | 1.7 (0.24)                  | 2.18                 |

**Movie S1:** Movie (top view) of O-antigen polysaccharides in R1-lps5 system with inner core (gray), antigen1 (orange), antigen2 (red), antigen3 (ochre), antigen4 (cyan), and antigen5 (blue) stick model representation. For clarity, ions and water molecules are not shown. The movie represents flexibility of O-anitgens above the OmpF vestibule from the beginning to the end of simulations (~300 ns).
